1 **Histone deacetylase 8 interacts with the GTPase SmRho1 in *Schistosoma mansoni***

2

3 Lucile Pagliazzo<sup>1</sup>, Stéphanie Caby<sup>1</sup>, Julien Lancelot<sup>1</sup>, Sophie Salomé-Desnoulez<sup>2</sup>, Jean-

4 Michel Saliou<sup>3</sup>, Thierry Chassat<sup>4</sup>, Katia Caillia<sup>5</sup>, Jérôme Vicogne<sup>1</sup>, Raymond J. Pierce<sup>1\*</sup>.

5

6 <sup>1</sup> Université de Lille, CNRS, Inserm, CHU Lille, Institut Pasteur de Lille, U1019 - UMR 9017

7 - CIIL - Centre d'Infection et d'Immunité de Lille, 59000 Lille, France.

8 <sup>2</sup> Université de Lille, CNRS, Inserm, CHU Lille, Institut Pasteur de Lille, US 41 - UMS 2014

9 - PLBS, 59000 Lille, France.

10 <sup>3</sup> Institut Pasteur de Lille - PLEHTA (Plateforme d'expérimentation et de Haute Technologie

11 Animale), 59019, Lille, France.

12 <sup>4</sup> Univ. Lille, CNRS, UMR 8576-UGSF-Unité de Glycobiologie Structurale et Fonctionnelle,

13 F-59000 Lille, France.

14

15 \* Corresponding author

16 E-mail: [raymond.pierce@pasteur-lille.fr](mailto:raymond.pierce@pasteur-lille.fr)

17

18

19

20

21

22

23

24

25

26

27

28 **Abstract**

29 **BACKGROUND:** *Schistosoma mansoni* histone deacetylase 8 (SmHDAC8) is a privileged  
30 target for drug discovery. Invalidation of its transcription by RNAi leads to impaired survival  
31 of the worms in infected mice and its inhibition causes cell apoptosis and death. To determine  
32 why it is a promising therapeutic target the study of the currently unknown cellular signaling  
33 pathways involving this enzyme is essential. Protein partners of SmHDAC8 have been  
34 identified by yeast two-hybrid (Y2H) cDNA library screening and by mass spectrometry  
35 (MS) analysis. Among these partners we characterized SmRho1, the schistosome orthologue  
36 of human RhoA GTPase, which is involved in the regulation of the cytoskeleton. In this work,  
37 we validated the interaction between SmHDAC8 and SmRho1 and explored the role of the  
38 lysine deacetylase in cytoskeletal regulation.

39

40 **METHODOLOGY/PRINCIPAL FINDINGS**

41 We characterized two isoforms of SmRho1, SmRho1.1 and SmRho1.2. Co-IP/Mass  
42 Spectrometry analysis identified SmRho1 partner proteins and we used two heterologous  
43 expression systems (Y2H assay and *Xenopus laevis* oocytes) to study interactions between  
44 SmHDAC8 and SmRho1 isoforms.

45 To confirm SmHDAC8 and SmRho interaction in adult worms and schistosomula, we  
46 performed co-immunoprecipitation (Co-IP) experiments and additionally demonstrated  
47 SmRho1 acetylation using a Nano LC-MS/MS approach. A major impact of SmHDAC8 in  
48 cytoskeleton organization was documented by treating adult worms and schistosomula with a  
49 selective SmHDAC8 inhibitor or using RNAi followed by confocal microscopy.

50

51 **CONCLUSIONS/SIGNIFICANCE**

52 Our results suggest that SmHDAC8 is involved in cytoskeleton organization *via* its interaction  
53 with the SmRho1.1 isoform. A specific interaction between SmHDAC8 and the C-terminal  
54 moiety of this isoform was demonstrated, and we showed that SmRho1 is acetylated on lysine  
55 K136. SmHDAC8 inhibition or knockdown using RNAi caused massive disruption of  
56 schistosomula actin cytoskeleton. A specific interaction between SmRho1.2 and SmDia  
57 suggested the existence of two signaling pathways that could regulate cytoskeleton  
58 organization *via* the two SmRho1 isoforms.

59

## 60 **Author summary**

61 *Schistosoma mansoni* is the major parasitic platyhelminth species causing intestinal  
62 schistosomiasis, for which around 200 million people are in need of treatment. Currently one  
63 drug, praziquantel, is the treatment of choice and its use in mass treatment programs, rendered  
64 imperative the development of new therapeutic agents. As new potential targets, we have  
65 focused on lysine deacetylases, and in particular *Schistosoma mansoni* histone deacetylase 8  
66 (SmHDAC8). Previous studies showed that invalidation of the transcription of SmHDAC8 by  
67 RNAi led to the impaired survival of the worms after the infection of mice. The analysis of  
68 the 3D structure of SmHDAC8 by X-ray crystallography showed that the catalytic domain  
69 structure diverges significantly from that of human HDAC8 and this was exploited to develop  
70 novel anti-schistosomal drugs. Biological roles of SmHDAC8 are unknown. For this reason,  
71 we previously characterized its protein partners and identified the schistosome orthologue of  
72 the human RhoA GTPase, suggesting the involvement of SmHDAC8 in the modulation of  
73 cytoskeleton organization. Here, we investigated the interaction between SmHDAC8 and  
74 SmRho1 and identified two SmRho1 isoforms (SmRho1.1 and SmRho1.2). Our study showed  
75 that SmHDAC8 is indeed involved in schistosome cytoskeleton organization.

76

## 77 **Introduction**

78 Schistosomiasis is a Neglected Tropical Disease (NTD) and represents the second  
79 most important human parasitic disease after malaria [1, 2]. It is caused by flatworm parasites  
80 of the genus *Schistosoma* and more than 200 million people are infected in 76 countries [3].  
81 Treatment and control of the disease depends on the only available drug, Praziquantel (PZQ).  
82 PZQ is effective specifically on adult worms and against the three major species of  
83 schistosomes infecting humans (*Schistosoma mansoni*, *S. haematobium* and *S. japonicum*  
84 [4]). However, its massive administration in endemic areas, in monotherapy, has promoted  
85 emergence of PZQ-tolerant and resistant parasites [5, 6, 7, 8, 9]. The need to find new drugs  
86 and new treatments is therefore imperative.

87 Lysine deacetylases (KDACs) also called Histone deacetylases (HDACs) form a  
88 family of enzymes that are conserved in metazoans. They are attractive therapeutic targets  
89 because they are involved in the regulation of gene transcription and are already actively  
90 studied as drug targets in other pathologies, particularly cancer [10]. Our previous studies  
91 identified and characterized three class I HDACs in *S. mansoni*: HDAC 1, 3 and 8 [11] and  
92 we have shown that Trichostatin A (TSA), a pan-inhibitor of HDACs, induces  
93 hyperacetylation of histones, deregulates gene expression and causes the death of schistosome  
94 larvae and adult worms in culture [12]. *S. mansoni* HDAC8 (SmHDAC8) is less conserved  
95 compared to its human orthologue than the other two class I schistosome HDACs [13].  
96 Moreover, invalidation of *SmHDAC8* transcripts by RNAi led to the impaired survival of the  
97 worms after the infection of mice, showing that it is a valid therapeutic target. The analysis of  
98 the 3D structure of SmHDAC8 by X-ray crystallography [13] showed that the catalytic  
99 domain structure diverged significantly from that of the human HDAC8 and this was  
100 exploited to identify selective inhibitors that induce apoptosis and death of worms and are  
101 thus lead compounds for the development of novel anti-schistosomal drugs [14]. However,

102 the precise biological roles of schistosomal HDAC8 were unknown and in order to determine  
103 why SmHDAC8 knockdown or inhibition causes cell apoptosis and worm death, it was  
104 essential to study the cellular signaling pathways involving SmHDAC8. Protein partners of  
105 SmHDAC8 have been characterized by screening a yeast two-hybrid cDNA library and mass  
106 spectrometry analysis [15]. Among the potential partners thus identified, the schistosome  
107 orthologue of the human GTPase RhoA, SmRho1, indicated a potential role for SmHDAC8 in  
108 cytoskeleton organization [15].

109 Rho GTPases (Ras homologous) belong to the superfamily of small Ras (Rat  
110 Sarcoma) monomeric G proteins that are extremely conserved in eukaryotes [16]. They are  
111 able, through the binding and hydrolysis of GTP, to create a switch between an active GTP-  
112 bound conformation and an inactive GDP-bound conformation. The “ON/OFF” activity of  
113 RhoGTPase is controlled by various regulatory proteins: the guanine nucleotide exchange  
114 factors (GEFs) induce the exchange of GDP for GTP; the GTPase-activating proteins (GAPs)  
115 promote the hydrolysis of GTP to GDP; and the GDP dissociation inhibitors (GDIs) inhibit  
116 the dissociation of GDP from the GTPase [17]. Activation of RhoGTPase by GEFs transduces  
117 signals to various effector molecules, while remaining in the GTP-bound form, hence  
118 regulating various cell functions through reorganization of the actin cytoskeleton, such as the  
119 formation of stress fibers and focal adhesions [18]. In *S. mansoni*, SmRho1 was identified and  
120 presents 71–75% identity to human RhoA, B, and C GTPases. SmRho1 was also able to  
121 complement a Rho1 null mutation in budding yeast *Saccharomyces cerevisiae* [19] and could  
122 therefore play a role in actin cytoskeleton regulation in the gonads of adult worms [20].  
123 Although HDAC8 is known to interact with specific cytoskeleton components [21], a direct  
124 link between HDAC8 and a RhoGTPase has never been shown. Moreover, RhoA was not  
125 identified by *Olson et al.* as a partner of human HDAC8 [22]. Interestingly, RhoA does not

126 seem to be acetylated in human, although its orthologue was found to be acetylated in  
127 *Schistosoma japonicum* [23].

128 In the present study, two closely related isoforms of SmRho1, which we named  
129 SmRho1.1 and SmRho1.2, were characterized at the molecular and functional levels. Based  
130 on these data, we focused on the interaction between SmRho1 isoforms and SmHDAC8.  
131 Studies in the parasite showed that SmHDAC8 interacts with SmRho1. Using mass  
132 spectrometry analysis, we have identified an acetylated lysine on SmRho1 in adult worms.  
133 Co-expression of SmRho1 isoforms and SmHDAC8 in *Xenopus* oocytes and in yeast shows a  
134 specific interaction between SmRho1.1 and SmHDAC8 that implicates the SmRho1.1 C-  
135 terminal domain. In the same way, we showed that SmRho1.2 co-immunoprecipitates with a  
136 Diaphanous homolog SmDia [24] and not with SmHDAC8. Finally, the use of selective  
137 inhibitors and RNAi, followed by confocal microscopy revealed that SmHDAC8 is involved  
138 in the regulation of the actin cytoskeleton organization, in adult worms and in schistosomula.  
139 Hence, here we demonstrate for the first time, the role of SmHDAC8 in modulating the  
140 organization of the schistosome cytoskeleton, possibly *via* the SmRho GTPase signaling  
141 pathway.

142

## 143 **Methods**

### 144 **Ethical statement.**

145 All animal experimentation was conducted in accordance with the European Convention for  
146 the Protection of Vertebrate Animals used for Experimental and other Scientific Purposes  
147 (ETS No 123, revised Appendix A) and was approved by the committee for ethics in animal  
148 experimentation of the Nord-Pas de Calais region (Authorization No. APAFIS#8289-  
149 2016122015127050v3) and the Pasteur Institute of Lille (Agreement No. B59350009).  
150 Experiments on *Xenopus* were performed according to the European Community Council

151 guidelines (86/609/EEC). The protocols were approved by the institutional local “Comité  
152 d’Ethique et d’Expérimentation Animale, Région Haut de France, F59-00913”.

153

#### 154 **Parasite material.**

155 A Puerto Rican strain of *S. mansoni* is maintained in the laboratory using the intermediate  
156 snail host *Biomphalaria glabrata* and the definitive golden hamster host *Mesocricetus*  
157 *auratus*. *S. mansoni* adult worms were obtained by hepatic portal perfusion of hamsters  
158 infected six weeks previously. Cercariae were released from infected snails, harvested on ice  
159 as described in [25] and schistosomula were obtained *in vitro* by mechanical transformation  
160 [25].

161

#### 162 **Frog and Oocytes handling**

163 *Xenopus laevis* females, obtained from the CRB-University of Rennes (France), were  
164 anesthetized with tricaine methane sulfonate (MS222, Sandoz) at 1 g. L<sup>-1</sup> for 45 min. After  
165 surgical removal of ovaries, stage VI oocytes were harvested by using a 1 h collagenase A  
166 treatment (1 mg. mL<sup>-1</sup>, Boehringer Mannheim) for 45 minutes followed by manual  
167 dissociation in ND96 medium (96 mM NaCl, 2 mM KCl, 1 mM MgCl<sub>2</sub>, 1.8 mM CaCl<sub>2</sub>, 5 mM  
168 HEPES, adjusted to pH 7.5 with NaOH). Oocytes were kept at 19°C.

169

#### 170 **Molecular cloning of SmRho1 isoforms**

171 Total RNA from adult worms was isolated using the RiboPure™ RNA Purification Kit. The  
172 cDNA was prepared using the GeneRacer™ kit with SuperScript™ III reverse transcriptase  
173 (Invitrogen) following the manufacturer's instructions. The 5' and 3' ends of *SmRho1.1* and  
174 *SmRho1.2* were determined by RACE PCR using the primers listed in S1 Table (RhoGTPase  
175 5'1 / 5'2 and 3'1 / 3'2) and amplified products were subcloned into the vector pCR™ 4-

176 TOPO<sup>®</sup> and sequenced (Eurofins Genomics). The full length *SmRho1* isoform sequences were  
177 amplified using FLRho1 5' and 3' primers and inserted into the pCR<sup>™</sup>4-TOPO<sup>®</sup> vector. A  
178 further PCR experiment was then carried out, using primers containing the *NdeI* and *BamHI*  
179 restriction sites respectively and the obtained fragment was again inserted into the pCR<sup>™</sup> 4-  
180 TOPO<sup>®</sup> vector.

### 181 **Phylogenetic analysis and protein modeling**

182 Phylogenetic analysis of eukaryotic RhoGTPases was performed using protein sequences  
183 from vertebrates, helminths (nematodes, cestodes, turbellariates), insects, molluscs and yeasts  
184 (S2 Table). The sequences were aligned using the BioEdit program using the ClustalW  
185 method [26]. The phylogenetic tree was generated by the MEGAX software under the JTT + I  
186 + G model with 1 000 bootstraps [27] and the maximum likelihood method. The modeling of  
187 the two isoforms of SmRho1 was performed using the I-Packer server  
188 (<https://zhanglab.ccmb.med.umich.edu/I-TASSER/>) and compared to the structure of human  
189 RhoA [28]. The characteristic domains and the different residues between SmRho1.1,  
190 SmRho1.2 and *Homo Sapiens* RhoA (HsRhoA) were highlighted using PYMOL software  
191 [29].

### 192 **Expression and purification of the SmRho1.1 and SmRho1.2 recombinant proteins**

193 SmRho1.1-pGADT7 and SmRho1.2-pGADT7 constructs were cut by *NdeI* and *BamHI*.  
194 Sequences were inserted in frame into the pNEA-tH plasmid (a kind gift from M. Marek and  
195 C. Romier, IGBMC, Strasbourg, France, which codes for a polyhistidine tag in the N-terminal  
196 position followed by a thrombin site), using T4 DNA Ligase (Invitrogen). Overexpression  
197 was carried out in *E. coli* BL21(DE3) cells in Luria Broth (LB) medium. Induction was done  
198 at 37°C by adding isopropyl-1-thio-β-D-galactopyranoside (IPTG, Euromedex) to a final  
199 concentration of 500 mM. Harvested bacteria were resuspended in lysis buffer (400 mM KCl,



200 10 mM Tris-HCl pH 8.0 and protease inhibitors (20  $\mu$ M leupeptin (Sigma), 2 $\mu$ g. mL<sup>-1</sup>  
201 aprotinin (Sigma), 200  $\mu$ M phenylmethylsulfonyl fluoride (PMSF, Sigma) and sonicated at  
202 4°C, 30 times for 30 s (maximum power, Bioruptor®plus, Diagenode). The lysate was  
203 clarified by ultracentrifugation (41 000 xG) for 1 h at 4°C. The supernatant was loaded onto  
204 Nickel affinity resin (Clonetech) pre-equilibrated with the lysis buffer and His-tagged  
205 SmRho1 proteins were released from the nickel resin by imidazol treatment. Protein  
206 concentrations were measured using the Pierce BCA Protein Assay Kit (Thermo Fisher  
207 Scientific).

208

### 209 **Production of anti-SmRho1 antibodies.**

210 Purified recombinant SmRho1.1 was used to generate mouse polyclonal antiserum. BALB/c  
211 mice were injected i.p. with 50  $\mu$ g of SmRho1.1 and alum adjuvant in a total volume of 500  
212  $\mu$ L, three times at two-week intervals. The mice were bled two weeks after the final injection.  
213 The monospecificity of the mouse antiserum was controlled on *S. mansoni* protein extract at  
214 all parasitic stages and on SmRho1 recombinant proteins by Western blot (S2 Fig).

215

### 216 **CoIP for Nano-LC–MS/MS analysis**

217 For mass spectrometry analysis, two independent experiments were performed. Adult worms  
218 (100 couples) were suspended in 500 $\mu$ L of lysis buffer (20mM TrisHCl pH 7.4, 50 mM NaCl,  
219 5 mM EDTA, 1% Triton and protease inhibitors (20  $\mu$ M leupeptin (Sigma), 2 $\mu$ g/mL aprotinin  
220 (Sigma), 200  $\mu$ M phenylmethylsulfonyl fluoride (Sigma), crushed with a Dounce  
221 homogenizer and sonicated ten times for 30 s (maximum power, Bioruptorplus, Diagenode).  
222 After centrifugation at 10,000g for 10 min at 4°C, immunoprecipitation of SmRho1 was  
223 performed using the Pierce Crosslink Immunoprecipitation Kit (Thermo Scientific) according  
224 to the manufacturer's instructions. Briefly, the protein lysate (500 $\mu$ L) was pre-cleared by

225 incubation with 20 $\mu$ L of IgG from rat serum crosslinked to protein-L Agarose beads (Thermo  
226 Scientific) for 2h at 4°C on a rotator. Then, pre-cleared lysate was collected after  
227 centrifugation, at 1,000 xG for 1 min at 4°C, and incubated overnight at 4°C on a rotator, with  
228 10 $\mu$ L of anti-SmRho1 antibodies or 10  $\mu$ L of IgG from mouse serum as a control, bound to  
229 protein-L Agarose beads [27].

230

### 231 **Mass-spectrometry proteomic analysis**

232 Protein samples were denatured at 100° C in 5% SDS, 5%  $\beta$ -mercaptoethanol, 1 mM EDTA,  
233 10% glycerol, and 10 mM Tris pH 8 buffer for 3 min, and subsequently fractionated on a 10%  
234 acrylamide SDS-PAGE gel. Electrophoretic migration was stopped when the protein sample  
235 had entered 1 cm into the separating gel. The gel was stained briefly with Coomassie Blue,  
236 and five bands, containing the whole sample, were cut out. Digestion of proteins in the gel  
237 slices was performed as previously described [30]. Separation of the protein digests was  
238 carried out using an UltiMate 3000 RSLCnano System (Thermo Fisher Scientific). Peptides  
239 were automatically fractionated onto a commercial C18 reversed phase column (75  $\mu$ m  $\times$  150  
240 mm, 2  $\mu$ m particle, PepMap100 RSLC column, Thermo Fisher Scientific, temperature 35°C).  
241 Trapping was performed during 4 min at 5  $\mu$ L. min<sup>-1</sup>, with solvent A (98% H<sub>2</sub>O, 2% ACN  
242 (acetonitrile) and 0.1% FA (Formic Acid)). Elution was carried out using two solvents, A  
243 (0.1% FA in water) and B (0.1% FA in ACN) at a flow rate of 0,3 mL/min. Gradient  
244 separation was 3 min at 5% B, 37 min from 5% B to 30% B, 5 min to 80% B, and maintained  
245 for 5 min. The column was equilibrated for 10 min with 5% buffer B prior to the next sample  
246 analysis. Peptides eluted from the C18 column were analyzed by Q-Exactive instruments  
247 (Thermo Fisher Scientific) using an electrospray voltage of 1.9 kV, and a capillary  
248 temperature of 275°C. Full MS scans were acquired in the Orbitrap mass analyzer over the  
249 m/z 300–1200 range with a resolution of 35 000 (m/z 200) and a target value of 5.00E + 05.

250 The ten most intense peaks with charge state between 2 and 4 were fragmented in the HCD  
251 collision cell with normalized collision energy of 27%, and tandem mass spectra were  
252 acquired in the Orbitrap mass analyzer with resolution 17,500 at m/z 200 and a target value of  
253 1.00E+05. The ion selection threshold was 5.0E+04 counts, and the maximum allowed ion  
254 accumulation times were 250 ms for full MS scans and 100 ms for tandem mass spectrum.  
255 Dynamic exclusion was set to 30 s. Raw data collected during nanoLC-MS/MS analyses were  
256 processed and converted into \*.mgf peak list format with Proteome Discoverer 1.4 (Thermo  
257 Fisher Scientific). MS/MS data were interpreted using search engine Mascot (version 2.4.0,  
258 Matrix Science, London, UK) installed on a local server. Searches were performed with a  
259 tolerance on mass measurement of 0.2 Da for precursor and 0.2 Da for fragment ions, against  
260 a composite target decoy database (25 970 total entries) built with the *S. mansoni* Uniprot  
261 database (taxonomy id 6183, 12 861 entries) fused with the sequences of recombinant trypsin  
262 and a list of classical contaminants (124 entries). Up to one trypsin missed cleavage was  
263 allowed. For each sample, peptides were filtered out according to the cut-off set for protein  
264 hits with one or more peptides longer than nine residues, an ion score >30, an identity score  
265 >6, leading to a protein false positive rate of 0.8%.

266

### 267 **Immunoprecipitation (IP) and Western blot analyses of proteins expressed in adult *S.***

#### 268 ***mansoni***

269 Adult worms (100 couples) and schistosomula (1000 parasites) were suspended in lysis buffer  
270 (20 mM Tris-HCl pH 7.4, 50 mM NaCl, 5 mM EDTA, 1% Triton and protease inhibitors: (20  
271  $\mu$ M leupeptin (Sigma), 2 $\mu$ g. mL<sup>-1</sup> aprotinin (Sigma), 200  $\mu$ M PMSF (Sigma) crushed with a  
272 Dounce homogenizer and sonicated ten times for 30 s (maximum power, Bioruptor®plus,  
273 Diagenode). After centrifugation, at 10 000 xG for 10 min at 4°C, immunoprecipitation of *S.*  
274 *mansoni* HDAC8 and SmRho1 was performed using the Pierce Crosslink

275 Immunoprecipitation Kit (Thermo Scientific) according to the manufacturer's instructions.  
276 Briefly, protein lysate (500  $\mu$ L) was incubated with 10  $\mu$ L of mouse polyclonal anti-  
277 SmHDAC8 or mouse polyclonal anti-SmRho1 crosslinked to protein-L Agarose beads  
278 (Thermo Scientific) overnight at 4°C on a rotator. As a negative control, a Co-IP with a  
279 mouse IgG antibody alone was performed.  
280 Proteins were separated on a 10% (v/v) SDS–polyacrylamide gel and blotted on to a  
281 nitrocellulose membrane. Blots were developed with a mouse polyclonal anti-SmHDAC8  
282 antibody (1/1000) or mouse polyclonal anti-SmRho1 antibody (1/1000) and peroxidase  
283 coupled anti-mouse secondary antibody (1/50 000; Invitrogen). Detection was carried out by  
284 chemiluminescence using SuperSignal™ West Dura Extended Duration Substrate (Thermo  
285 Scientific) and ImageQuant™ LAS 4000 imager (GE Healthcare).

286

### 287 **Plasmid constructs**

288 The sequence encoding SmHDAC8 was inserted in frame into the pGBKT7-BDB expression  
289 vector (Clontech) using the T4 DNA Ligase (Invitrogen) to generate the SmDAC8-pGBKT7  
290 construct as previously described [15]. SmRho1.1-pCR4-TOPO and SmRho1.2-pCR4-TOPO  
291 were cut by *Bam*HI and *Nde*I and the sequences were inserted in frame into the pGADT7-AD  
292 expression vector (Clontech) using the T4 DNA Ligase (Invitrogen) (SmRho1.1-pGADT7  
293 and SmRho1.2-pGADT7).

294 Site-directed mutagenesis of SmRho1 mutant constructs was performed using the Isis DNA  
295 polymerase™ (MP Biomedicals). The SmRho1.1-pGADT7 construct was used as a template  
296 for the production of the SmRho1.1 E33K mutant in which the glutamic acid at position 33 is  
297 replaced by a lysine residue, using as primers SmRho1.1 E33K 5'/ SmRho1.1 E33K 3'.  
298 Similarly, the SmRho1.2 K33E construct was obtained using as primers SmRho1.2 K33E  
299 5'/SmRho1.2 K33E 3' and SmRho1.2-pGADT7 as template. SmRho1.1-88 aa and

300 SmRho1.1-143 aa fragments were obtained using respectively SmRho1.1-88 aa 5'/SmRho1.1-  
301 88 aa 3' and SmRho1.1-143 aa 5'/SmRho1.1-143 aa 3' as primers to generate a stop codon. For  
302 SmRho1.1 EM and SmRho1.1 EMNN mutants, the glutamine Q147 and the valine V148 of  
303 SmRho1.1 were substituted by a glutamic acid and a methionine (SmRho1.1 EM) and then  
304 the lysine K151 and the serine S153 by two asparagine residues (SmRho1.1 EMNN).  
305 Similarly, SmRho1.2 QV and SmRho1.2 QVKS mutants were produced by site-directed  
306 mutagenesis using the SmRho1.2 construct. First, the glutamic acid E147 and the methionine  
307 M148 were substituted by a glutamine and a valine and then, the two asparagines N151 and  
308 N153 were replaced respectively by a lysine and a serine.

309

### 310 **Yeast two hybrid assay**

311 The *Saccharomyces cerevisiae* Y187 strain was transformed with the SmHDAC8-pGBKT7  
312 bait construct and mated overnight with the AH109 strain transformed with the  
313 SmRho1 construct. After incubation, diploid yeasts were plated on selective medium lacking  
314 leucine and tryptophan and then on selective medium lacking adenine, histidine, leucine and  
315 tryptophan and the plates were incubated at 30°C.

316

### 317 **In vitro synthesis of cRNAs**

318 cRNAs encoding for SmHDAC8, SmRho1 (SmRho1.1, SmRho1.2, mutants SmRho1.1  
319 E333K, SmRho1.2 K33E, 1-88 aa and 1-143 aa, SmRho1.1 EM and SmRho1.1 EMNN,  
320 SmRho1.2 QV and SmRho1.2 QVKS) and SmDia-RDB (a kind gift from Pr C. Grevelding,  
321 Institute of Parasitology, Justus-Liebig-University, Giessen, Germany) were synthesized using  
322 the T7 mMessage mMachine® kit (Ambion, USA). The SmHDAC8-pGBKT7, SmRho1-  
323 pGADT7 (SmRho1.1, SmRho1.2) and SmDia-RBD-pGBKT7 constructs were linearized  
324 using the restriction enzyme *NotI*. The SmRho1 mutant constructs were linearized using the

325 restriction enzyme HindIII. cRNAs were precipitated by 2.5 M LiCl, washed in 70% ethanol,  
326 suspended in 20 mL diethylpyrocarbonate (DEPC)-treated water, and quantified by  
327 spectrophotometry. cRNAs were analyzed in a denaturing agarose gel. Gel staining with 10  
328 mg. mL<sup>-1</sup> ethidium bromide confirmed correct sizes and of absence of abortive transcripts.  
329 cRNA preparations (1 mg. mL<sup>-1</sup>) were microinjected into *Xenopus* oocytes (stage VI) as  
330 follows. Each oocyte was injected with 60 nL of cRNA in the equatorial region and incubated  
331 at 19°C in ND96 medium supplemented with 50 mg. mL<sup>-1</sup> streptomycin/penicillin, 225 mg.  
332 mL<sup>-1</sup> sodium pyruvate, 30 mg. mL<sup>-1</sup> trypsin inhibitor) for 18 h.

333

334 **Co-immunoprecipitation (CoIP) and Western Blot analysis of proteins expressed in**  
335 ***Xenopus laevis* oocytes**

336 Immunoprecipitation of SmHDAC8, SmDia-RBD and SmRho1 (isoforms and mutant  
337 constructs) proteins expressed in oocytes was performed using respectively HA and Myc tags.  
338 15h after cRNA injection in the equatorial region, oocytes were lysed in buffer (50 mM  
339 HEPES pH 7.4, 500 mM NaCl, 0.05% SDS, 0.5% Triton X100, 5 mM MgCl<sub>2</sub>, 1 mg. mL<sup>-1</sup>  
340 bovine serum albumin, 10 mg. mL<sup>-1</sup> leupeptin, 10 mg. mL<sup>-1</sup> aprotinin, 10 mg. mL<sup>-1</sup> soybean  
341 trypsin inhibitor, 10 mg. mL<sup>-1</sup> benzamidine, 1 mM sodium vanadate) and centrifuged at 4°C  
342 for 15 min at 10 000 xG. Supernatants were incubated with anti-Myc (1/100; Invitrogen) and  
343 anti-HA (1/100 Invitrogen) antibodies for 4 h at 4°C. Protein A-Sepharose beads (5 mg,  
344 Amersham Biosciences) were added for 1 h at 4°C. Immune complexes were collected by  
345 centrifugation, rinsed three times, resuspended in Laemmli sample buffer, and subjected to a  
346 10% SDS-PAGE. Immune complexes were analyzed by Western blotting using anti-Myc  
347 (1/50 000) or anti-HA (1/10 000) antibodies and the advanced ECL detection system  
348 (Amersham Biosciences).

349

## 350 **RNAi-mediated knockdown of *SmHDAC8* and *SmRho1***

351 The *SmHDAC8* specific PCR primers containing the T7 promoter-tail amplified ~500 bp  
352 fragments (S1 Table). Similarly, the *SmRho1* specific PCR primers containing the T7  
353 promoter-tail amplified a ~500 bp fragment (S1 Table). A luciferase nonspecific ~500 bp  
354 control was used (S1 Table). Double-stranded RNAs (dsRNAs) were synthesized *in*  
355 *vitro* from adult worm cDNA using the Megascript RNAi kit (Ambion) according to the  
356 manufacturer's instructions and concentrations were determined spectrophotometrically  
357 (NanoVue Plus™, GE Healthcare). dsRNAs were also analyzed by 1% agarose  
358 electrophoresis to check the integrity and annealing of the dsRNA transcripts.

359 To deliver the dsRNA, 10 adult couples/group in 100 µL M199 medium containing 25 µg  
360 dsRNA, were electroporated in a 4 mm cuvette by applying a square wave with a single 20 ms  
361 impulse, at 125 V and at room temperature. Adult worms were then transferred to 4 mL  
362 complete M199. After two days in culture, 2 mL of medium was removed and 2 mL of fresh  
363 complete M199 culture medium was added. Gene knockdown was monitored by qRT-PCR 5  
364 days after dsRNA treatment. For RNAi experiments on schistosomula, dsRNA delivery was  
365 performed using the soaking method. 10 µg of dsRNA was added to 2000 parasites in 4 ml  
366 complete M199 medium and after two days in culture, gene knockdown was monitored by  
367 qRT-PCR. Microscopic examination of RNAi-treated worms was carried out exactly as  
368 described below.

369

## 370 **Quantitative RT-PCR**

371 Complementary DNAs were obtained by reverse transcription of total RNA using the  
372 NucleoSpin RNA/Protein kit (Macherey-Nagel) and used as templates for PCR amplification  
373 using Brilliant III Ultra-Fast QPCR Master Mix (Agilent) and QuantStudio™ 3 Real-Time  
374 PCR System (Applied Biosystems).

375 Primers specific for *S. mansoni* *HDAC8*, *Rho1.1* and *Rho1.2* were designed by the Primer-  
376 BLAST tool (NCBI) and used for amplification in duplicate assays (S1 Table). Measurements  
377 of real time PCR efficiency for each primer pair allowed the ratios of expression to be  
378 calculated using the  $2^{-DDCt}$  ratio with *S. mansoni* *PSMB7* as the reference transcript [31].

### 379 **Phenotypic analysis by confocal laser scanning microscopy**

380 Adult worms (10 couples) were treated with sub-lethal doses of inhibitors; for 16 h with TH65  
381 [32], trichostatin A (TSA) or Rho Inhibitor I at 50  $\mu$ M, 10  $\mu$ M and 4 $\mu$ g. mL<sup>-1</sup> respectively.  
382 Similarly, schistosomula (2000 parasites) were treated with TH65 (10  $\mu$ M), TSA (3  $\mu$ M) or  
383 Rho Inhibitor I (2 $\mu$ g. mL<sup>-1</sup>) for 16h. Parasites treated with Dimethyl sulfoxide (DMSO) were  
384 used as negative controls. After treatment, parasites were fixed in 8% PFA  
385 (paraformaldehyde) - CB buffer solution (Cytoskeletal Buffer: 10 mM Hepes, 150 mM NaCl,  
386 5 mM EGTA, 5 mM glucose, 5 mM MgCl<sub>2</sub>, pH 6,1), for 1h at room temperature. The fixed  
387 parasites were then incubated with CB buffer containing 0.05% saponin, NH<sub>4</sub>Cl (50 mM) and  
388 phalloidin (Alexa Fluor 488, Thermo Fischer Scientific, at 1/1000 dilution), overnight at room  
389 temperature to stain actin filaments. Three washes were performed in CB buffer and DAPI  
390 (1/1000 dilution, Thermo Fischer Scientific) was added during the third wash for 10 min at  
391 room temperature. Mowiol (Calbiochem) was used as mounting solution. Samples were  
392 pictured with a Zeiss LSM 880 confocal line scanning microscope (Zeiss microscopy GmbH,  
393 Germany) using an Airyscan detector and 63x oil immersion lens to obtain high-resolution  
394 images (voxel 0.35x0.35x0.30  $\mu$ m<sup>3</sup>). Images were processed using Zen software (Version2,  
395 Zeiss, France) for Airyscan processing. The visualization of the samples in depth were  
396 obtained by maximum intensity projection on an adapted selection of Z planes of the Z-stack  
397 and using orthogonal views created with the FIJI.

398



## 399 **Results and Discussion**

### 400 Identification and characterization of the two SmRho1 isoforms.

401       Among the Rho family of small proteins (~21 kDa) the Ras homolog family, member  
402 A, (RhoA), Ras-related C3 botulinum toxin substrate 1 (Rac1) and Cell Division Control  
403 protein 42 homolog (Cdc42) are the most studied members. Santos and coworkers [33]  
404 characterized Rho1 in *S. mansoni*, showing that it is related to the vertebrate RhoA, B, C  
405 subfamily and that SmRho1 complemented an *S. cerevisiae* Rho1 null strain. The SmRho  
406 family was further characterized by Vermeire and coworkers [19] and they identified *S.*  
407 *mansoni* orthologs of RhoA, CDC42 and Rac1. Interestingly, using the yeast two-hybrid  
408 methodology and mass spectrometry analysis, we recently identified the *S. mansoni* Ras  
409 homolog 1 (SmRho1), as a SmHDAC8 partner protein [15]. Moreover, after a more detailed  
410 reconstruction of the *SmRho1* gene using RT-PCR, we discovered that two distinct genes  
411 encode Rho1 isoforms: *Rho1.1* and *1.2*. These two genes code for two proteins of 193  
412 residues organized into several domains, as for all RhoGTPases (Fig 1A). ClustalW alignment  
413 shows 96.37% identity between the two encoded proteins that differ only in 7 amino acids,  
414 and they share respectively 72% and 73% identity with the *Homo sapiens* RhoA (HsRhoA).  
415 They have an identical sequence in the switch I domain (residues 29–38 in RhoA) except for  
416 the positions 33 where the glutamic acid in SmRho1.2 is replaced by a lysine residue in  
417 SmRho1.1 (Fig 1A-B). The RhoGTPases contain five GTPase domains named «G boxes »  
418 (G1-G5) (in blue) and two functional elements, Switch I and II (boxed in green and yellow,  
419 respectively), which can interact with many regulators (GEFs, GAPs and GDIs) and effectors  
420 (Fig 1A). As expected, the G domains and Switch II domain are completely conserved. At  
421 their C-termini both SmRho1.1 and SmRho1.2 contain a conserved prenylation motif (CDLI)  
422 CAAX (C represents cysteine, A is an aliphatic amino acid and X is a terminal amino acid)

423 sequence. This motif is preceded by a run of basic amino acids (KKKRRR) which determine  
424 cellular localization for each protein [34], also typically found in Rho GTPases.

425 Using the threading method to predict SmRho1 isoform structures, we anticipated a  
426 conserved folding between SmRho1 isoforms and human RhoA consisting in a six-stranded  
427  $\beta$ -sheet surrounded by  $\alpha$ -helices connected with loops, as found in human RhoA and other  
428 related small GTPases (Fig 1B-C). The  $\beta$ -sheet is formed by the anti-parallel association of  
429 two extended  $\beta$ -strands (B2 and B3) and the parallel association of five extended  $\beta$ -strands  
430 (B3, B1, B4, B5, B6) (Fig 1C). SmRho1.1 contains six  $\alpha$ -helices (A1, A2, A3, A4, A5 and  
431 A6) and two  $3_{10}$ -helices (H1–H2) whereas SmRho1.2 contains only one  $3_{10}$  helix (H1) like  
432 human RhoA (Fig 1C). Three-dimensional models of the structures of SmRho1.1 and  
433 SmRho1.2 indicate that mutated amino acids (in red) are located on the surface of the proteins  
434 and form potential interaction domains for their partners (Fig 1D). The comparison with the  
435 HsRhoA three-dimensional model shows that differences in amino acid sequences do not  
436 affect the overall structure of this potential interaction surface (Fig 1D).

437 Several studies have resulted in the characterization of a number of Rho members  
438 subdivided into 8 subfamilies: Rho, Rac, Cdc42, RhoD/Rif, Rnd, Wrch-1/Chp, RhoH and  
439 RhoBTB [35] (Fig 2). In order to understand the phylogenetic relationships within the  
440 schistosome Rho family and within metazoans we have constructed a phylogenetic tree  
441 including the subfamilies of the Rho GTPases and RAS superfamily with mitochondrial  
442 RhoGTPases as an outgroup. Amino acid sequences from Vertebrates, Insects, Nematodes,  
443 Cestodes, Trematodes and Ascomycetes were included in this analysis. Phylogenetic analysis  
444 showed that schistosomes have a low number of orthologs of the main mammalian Rho  
445 subfamilies. We initially identified 7 Rho-like proteins in *S. mansoni*, but only 4 in *S.*  
446 *haematobium* and in *S. japonicum*. We found that schistosome Rho, Rac and Cdc42 clustered  
447 together with all Rho, Rac and Cdc42 orthologues (Fig 2, Red, green and purple clusters).

448 ML analysis was also performed to characterize the phylogenetic positions of the  
 449 recently discovered SmRho1.1 and SmRho1.2 Rho proteins. These proteins, cluster together  
 450 with high fidelity (bootstrap = 99) inside the RhoA, B, C subfamily, indicating that *SmRho1.1*  
 451 and *SmRho1.2* are probably paralogous genes that are orthologs to the human RhoA, B, C  
 452 family. *S. haematobium* and *S. japonicum* do not seem to have undergone the same  
 453 duplication, suggesting that the SmRho1 duplication is recent. Moreover, the phylogenetic  
 454 analysis indicates probable conserved functions between the vertebrate and platyhelminth  
 455 proteins (Fig 2, Red cluster).

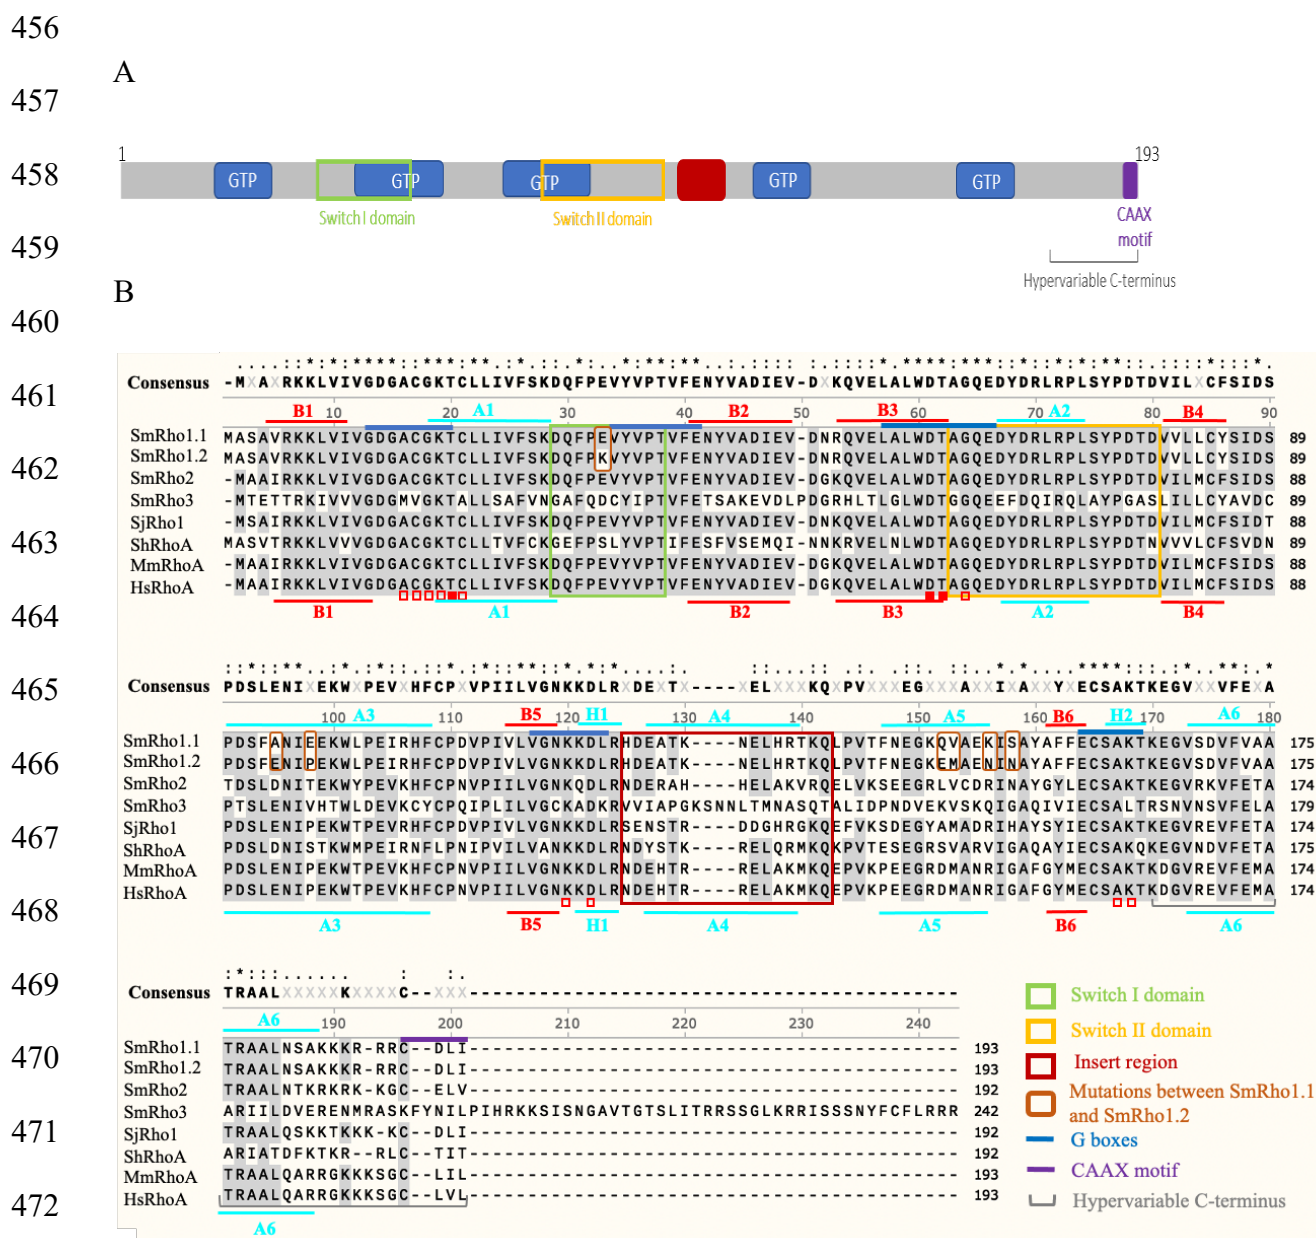

473

474

475

476

477

478

479

480

481

482

483

484

485

486

487

488

489

490

491

492

493

494

495

496

497

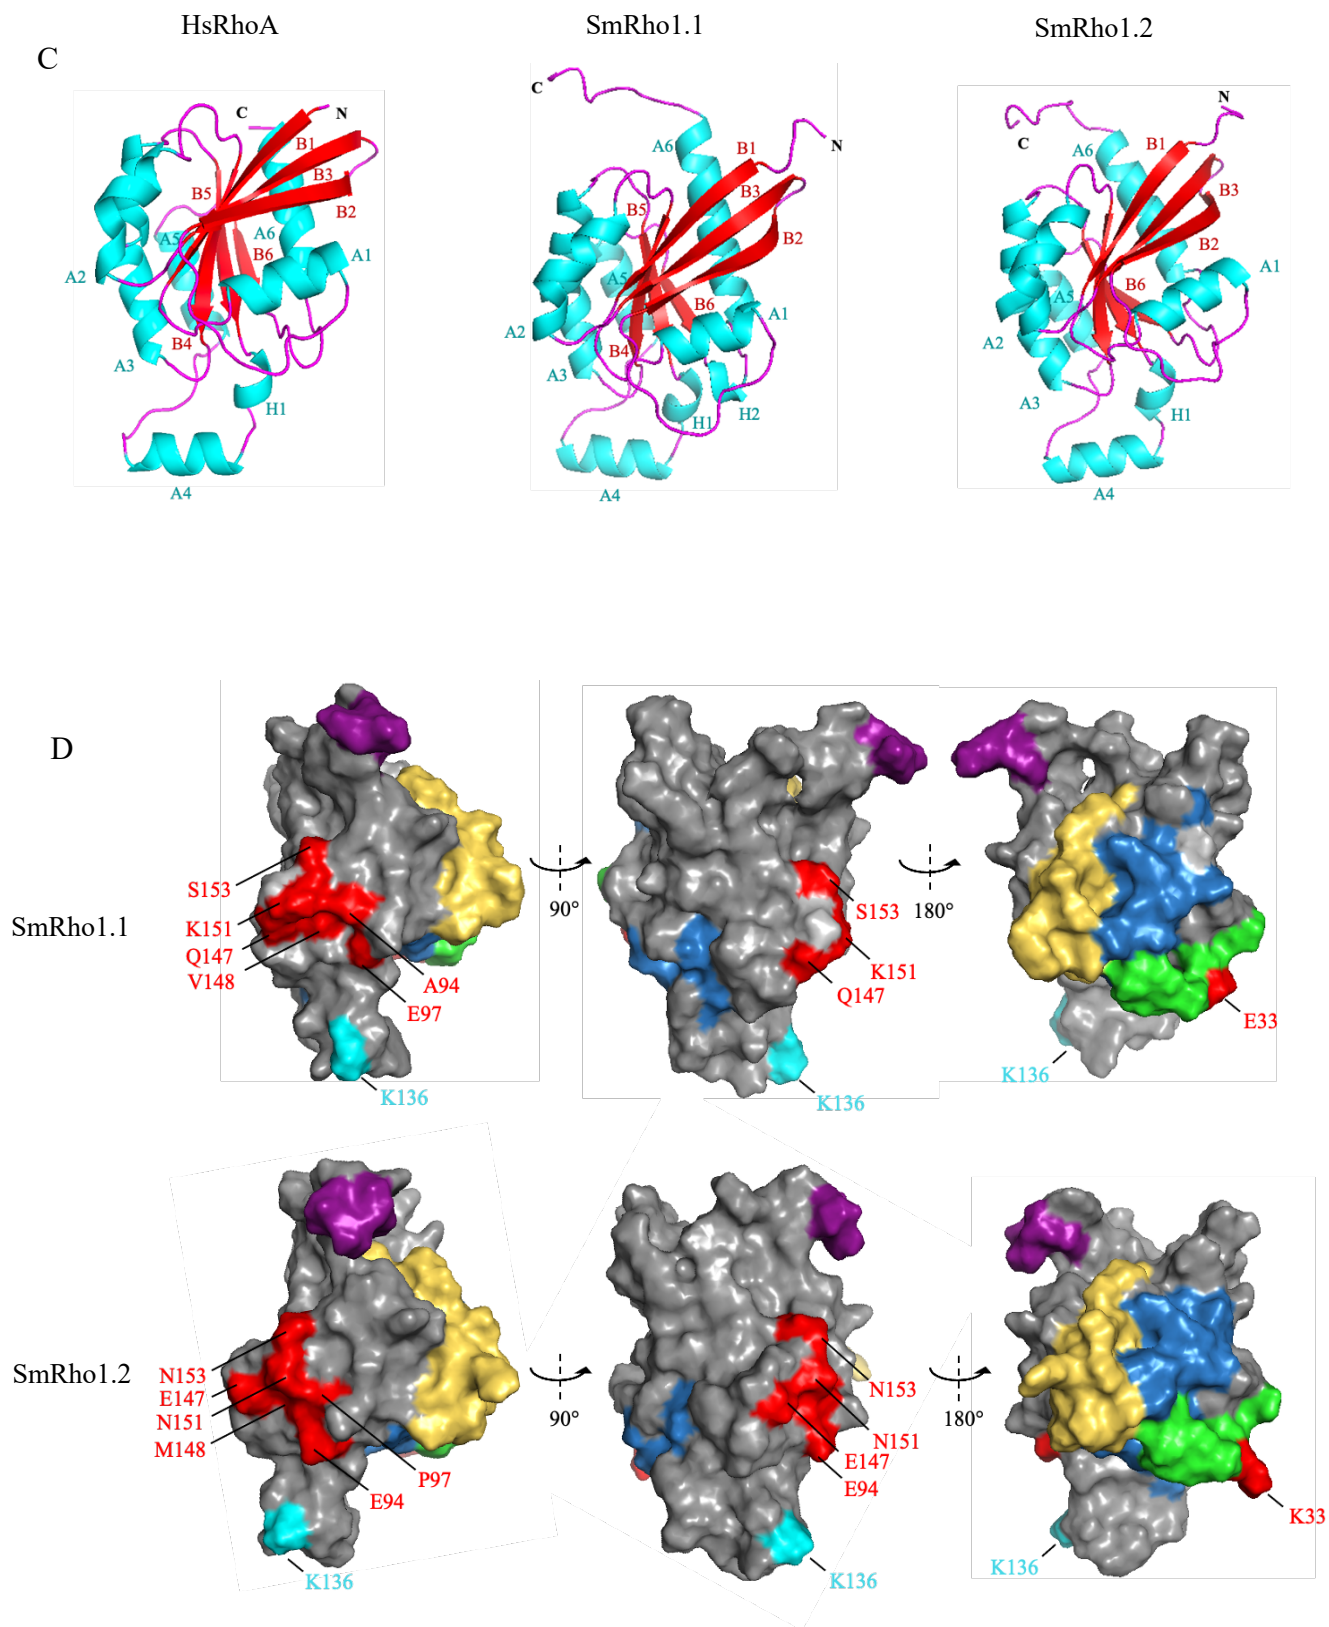

498

499

500

501

502

503

504

505

506

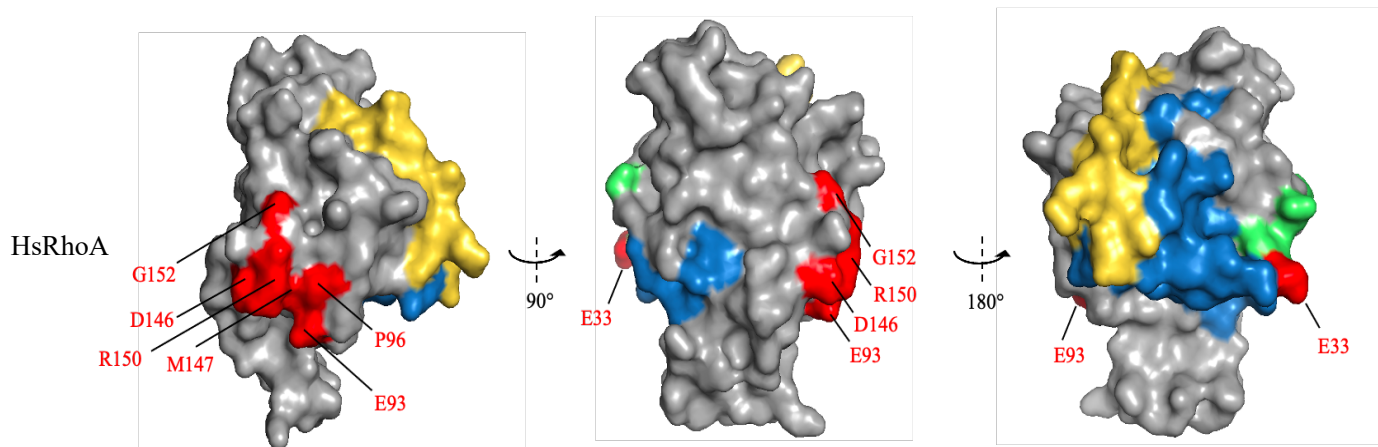

507

**Fig 1: Molecular and structural characterization of two SmRho1 isoforms.**

508

509

510

511

512

513

514

515

516

517

518

519

520

521

522

(A) The SmRho1 isoforms are proteins of 193 amino acids. SmRho1.1 and SmRho1.2 contain five GTPase domains named «G boxes» (G1-G5) (in blue) and two functional elements, Switch I and II (boxed in green and yellow, respectively), which can interact with many regulators (GEFs, GAPs and GDIs) and effectors. The insert region (in red) is essential for RhoGTPase functions [36]. The C-terminal part presents a hypervariable domain and a prenylation motif CAAX (C = cysteine residue, A= aliphatic residue).

(B) Sequence alignment between the *S. mansoni* Rho1 isoforms, *S. mansoni* Rho2 (Uniprot G4V9A8) and Rho3 (Uniprot Q8I8A0), *Schistosoma japonicum* Rho1 (Uniprot Q8MUI8), RhoA of *Schistosoma haematobium* (Uniprot A0A094ZFT0) and Human (Uniprot P61586) and mouse RhoA (Uniprot Q9QUI0). Sequences were aligned using ClustalW Multiple Alignment (SnapGene). The identical and semi conserved amino acids are highlighted in black and gray respectively. Residues not conserved between SmRho1.1 and SmRho1.2 are boxed in orange. SmRho1.1 and SmRho1.2 both share high sequence similarity with HsRhoA (respectively 72% et 73%). The secondary structure elements of SmRho1 isoforms and HsRhoA are indicated at the top and below the aligned sequences, respectively.

523 (C) Modeling of the tertiary structure of SmRho1 isoforms and HsRhoA [28]. Shown is a  
524 ribbon representation of SmRho1 isoforms and HsRhoA with  $\beta$ -strands (red),  $\alpha$ -helices  
525 (cyan), and  $3_{10}$ -helices (cyan).

526 (D) Surface representation of proteins structures with Switch I and II (green and yellow,  
527 respectively), G boxes (in blue). For SmRho1 isoforms, the CAAX prenylated site is shown in  
528 purple and the acetylated lysine in cyan. The amino acid sequence differences between  
529 SmRho1 isoforms and HsRhoA are shown in red.

530

531

532

533

534

535

536

537

538

539

540

541

542

543

544

545

546

547

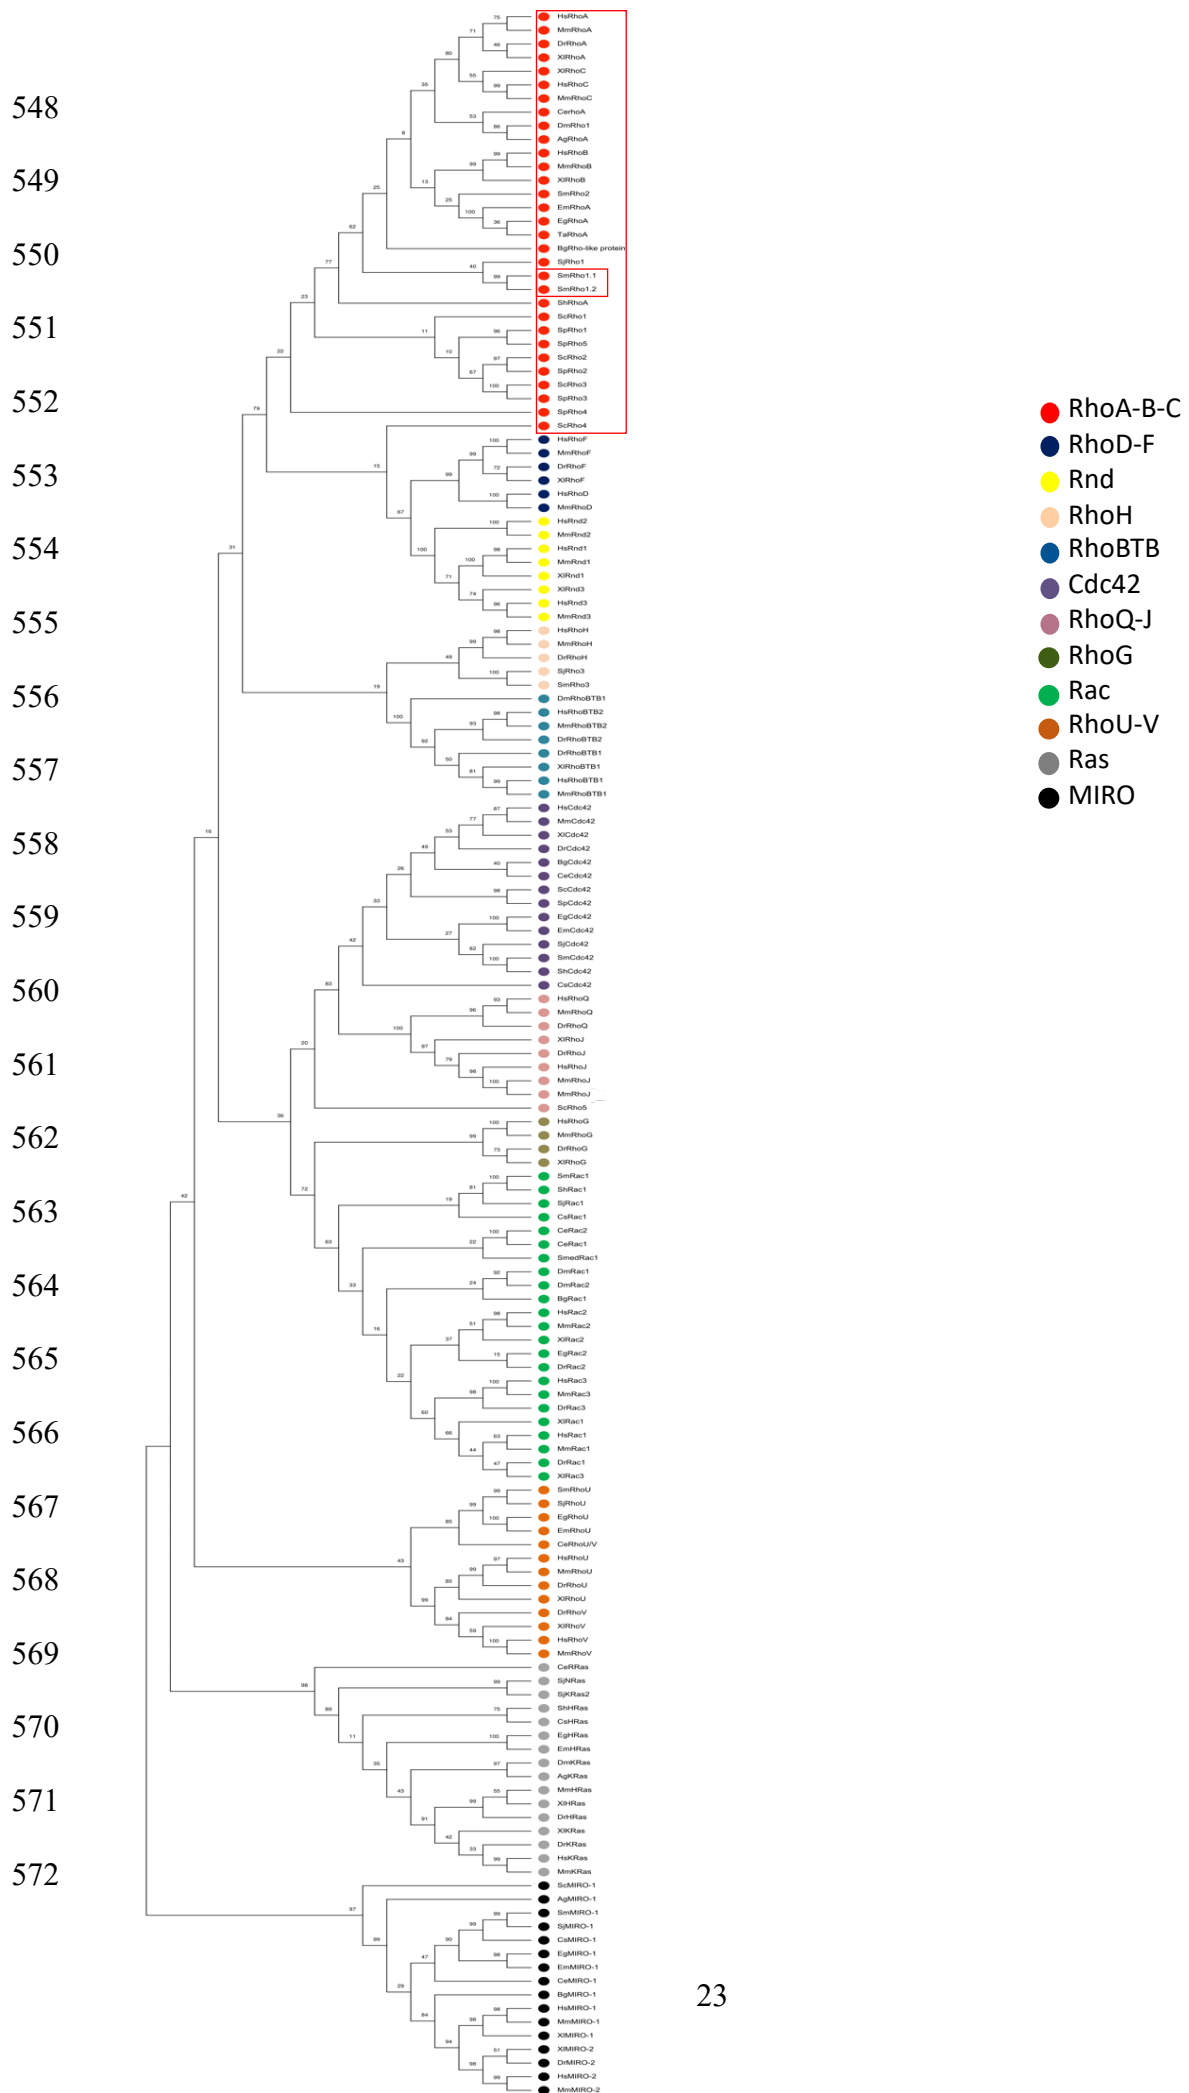

573 **Fig 2: SmRho1.1 and SmRho1.2 are orthologous to human RhoA.**

574 Phylogenetic tree of RhoGTPases from vertebrates, platyhelminths (trematodes, cestodes and  
575 turbellarians), nematodes and insects, obtained with the Maximum-Likelihood (ML)  
576 algorithm. Numbers on internal branches are the bootstrap values. SmRho1 isoforms are  
577 circled in red. SmRho1.1 and SmRho1.2 cluster with the human RhoA, B, C clade (circled in  
578 red). The data generated also suggest that SmRho1.1 and SmRho1.2 are paralogs, which are  
579 orthologous to human RhoA, and originate from a recent gene duplication.

580

581 **Biological functions of the two SmRho1 isoforms**

582 To understand and predict specific function of the new SmRho1.1 and SmRho1.2 proteins in  
583 *S. mansoni*, we carried out co-immunoprecipitation (Co-IP) experiments followed by mass  
584 spectrometry (MS) analysis. Two independent Co-IP experiments were performed (named IP1  
585 and IP2), using an anti-SmRho1 antibody which we produced in house in mice (S2 Fig) with  
586 pre-bleed serum as control. MS analysis of the Co-IP proteins identified 1,000 different  
587 proteins (S3 Table). As expected, we demonstrated that our mouse anti-SmRho1 antibodies  
588 were not able to discriminate between the two SmRho1 isoforms (S1 Fig). We also noted a  
589 high degree of variation between identified proteins in each Co-IP experiment that can be  
590 explained by difficulties in trapping dynamic protein complexes, which potentially depend on  
591 post-translational modifications and GTP/GDP levels. In addition, *S. mansoni* is a complex  
592 multicellular parasite and protein quantities can vary between the different cellular types  
593 within a given worm as well as between different parasites. Finally, it should be noted that the  
594 two parasite protein extracts were each obtained from a pool of *S. mansoni* adult worms  
595 couples. Of the 1,000 proteins for which peptides were detected, we retained 86 and 32  
596 proteins from IP1 and 2 respectively. Proteins that completed the three following criteria were  
597 considered: (i) at least three peptides in the Co-IP experiment, (ii) with no more than two



598 peptides in the control and (iii) with a spectral count ratio between Co-IP SmRho1 and control  
599 of greater than 3. These proteins are involved in 23 different biological processes (Fig 3), such  
600 as cytoskeleton organization, stress response or protein transport.

601 Interestingly, we identified cofilin (Accession number G4LZY0) as an SmRho1 partner (Fig  
602 3). Human cofilin is involved in the stabilization of actin filaments and forms a protein  
603 complex with RhoA and ROCK [36]. ROCK1 is the effector of GTP-RhoA and after its  
604 activation, the downstream effectors, myosin light chain (MLC) and cofilin are activated by  
605 phosphorylation. Phosphorylated MLC stimulates the binding of myosin to actin to regulate  
606 actin filament assembly [37]. Although ROCK was not found as a partner of SmRho1, it is  
607 comforting to find cofilin as one of the members of a potential parasite protein complex  
608 formed by SmRho1, SmROCK1, SmLIMK and the Myosin light chain (MLC, Accession  
609 number G4VBS3) also identified as an SmRho1 partner. It was also shown that the activity of  
610 RhoA and its effector ROCK is inhibited by Rap1 signaling and PKA to regulate coronary  
611 artery relaxation [38]. The connection between SmRho1 and SmRap1 (Putative Rap1,  
612 Accession number G4VE67) illustrates once again the involvement of the GTPase in the  
613 regulation of cytoskeletal events.

614 Several regulatory partners were identified: the RhoGDI protein (Rho GDP-dissociation  
615 inhibitor-related, Accession number G4VK76), a negative regulator of Rho GTPase activity,  
616 has also been identified as an SmRho1 partner, suggesting that this regulatory mechanism for  
617 RhoGTPase activity is conserved in *S. mansoni*. Other regulatory proteins like GEFs or GAPs  
618 were absent from the SmRho1 interactome. In humans, ARHGEF10, a RhoA GEF, is known  
619 to interact with Rab6A and Rab8A, which has functions in the exocytotic pathway, and  
620 colocalized with Rab proteins at exocytotic vesicles. Here, we indicate an interaction between  
621 SmRho1 and SmRab6 (Putative Rab6, Accession number G4LXF1) that could suggest the

622 existence of a connection between the signaling of Rab proteins with SmRho1 during  
623 membrane trafficking, probably *via* this GEF regulator.

624 We have also identified Smkinesin (Kinesin-like protein, Accession number G4V5R8),  
625 Smspectrin (Putative spectrin beta chain, Accession number G4VDE6) and Smankyrin  
626 (Putative ankyrin, n°G4VKA7) as SmRho1 partners. Kinesins belongs to a class of motor  
627 proteins that move along microtubules. Pan and coworkers found that BNIP-2, a BCH  
628 domain-containing protein binds RhoA, RhoGEF and kinesin-1 to regulate microtubule  
629 dynamics [39]. In addition, it was shown that RhoA-GTP binds a protein inserted in  
630 endoplasmic reticulum membranes named kinectin or KTN1 that interacts with the cargo-  
631 binding site of kinesin, thus activating its microtubule-stimulated ATPase activity, which is  
632 required for vesicle motility [40]. Kinesin also interacts with spectrin and ankyrin to regulate  
633 intracellular organelle transport [41]. In eukaryotic cells, spectrin is a cytoskeletal protein that  
634 lines the intracellular side of the plasma membrane. It forms pentagonal or hexagonal  
635 arrangements, forming a scaffold that plays an essential role in plasma membrane integrity  
636 and cytoskeletal structure. Ankyrins form a family of proteins that mediate the attachment of  
637 membrane proteins to the spectrin-actin cytoskeleton. Thus, the ankyrin-spectrin assembly  
638 provides mechanical stability to the lipid bilayer in addition to organization of membrane  
639 proteins. Moreover, in *Xenopus laevis*, Cho and coworkers demonstrated that cytoskeletal  
640 organization, cell adhesion and ectodermal integrity are biological processes regulates by a  
641 catenin- spectrin-ankyrin-p190RhoGAP complex via RhoA activity [42].

642 The cytoskeletal element, Sm $\alpha$ -actinin (Putative alpha-actinin, Accession number G4VBW4)  
643 was found in the SmRho1 interactome.  $\alpha$ -actinins form a family of cytoskeletal actin-binding  
644 proteins playing crucial roles in organizing the framework of the cytoskeleton through  
645 crosslinking the actin filaments, as well as in focal adhesion maturation. Intriguingly, some  
646 actin binding proteins and regulators of the actin cytoskeleton, such as  $\alpha$ -actinin, and spectrin

647 interact directly or indirectly with NMDA receptors [43]. Moreover, p250GAP is the first Rho  
648 family GAP GTPase shown to be enriched in the NMDA receptor complex, suggesting that  
649 p250GAP links NMDA receptor to actin reorganization via RhoA [44].

650

651 Unexpectedly, using this Co-IP/ MS approach, we did not identify SmROCK and  
652 GAPs, and more surprisingly, SmHDAC8. As we have already seen, the dynamics of protein–  
653 protein interaction networks or absence of post-translational modifications could explain the  
654 absence of the histone deacetylase. Moreover, some proteins identified may be members of  
655 immunoprecipitated complexes and are not direct partners and it is possible that our  
656 polyclonal serum mask the binding sites with some of them.

657 In support of this hypothesis, Karolczak-Bayatti and coworkers have shown that human  
658 HDAC8 co-immunoprecipitates with cofilin [45]. We can assume that SmHDAC8 and  
659 SmRho1 form a multiprotein complex, especially with cofilin. Another element to be borne in  
660 mind is that SmRho1 may in fact be a substrate of SmHDAC8, leading to an ephemeral  
661 interaction. Moreover, SmHDAC8 is not highly expressed in adult worms. CoIP followed by  
662 western blotting, which is more sensitive, did allow us to detect SmHDAC8 bound to  
663 SmRho1 (see below). In addition, this interaction was confirmed in vitro using the proteins  
664 overexpressed in yeast and *Xenopus* oocytes.

665 In conclusion, our results show that SmRho1 is involved in cytosolic processes regulating  
666 cytoskeleton function, as does the human ortholog, HsRhoA. Despite the fact that we did not  
667 identify all the same protein partners as for human RhoA, the identification of the different  
668 components of the cytoskeleton such as Smspectrin, Sm $\alpha$ -actinin or Smcofilin suggests that  
669 signaling pathways involving SmRho1 are conserved in *S. mansoni*. However, since we  
670 cannot discriminate between the two SmRho1 isoforms using our MS analysis, no  
671 conclusions can be drawn concerning the specific roles of each SmRho1 isoform.

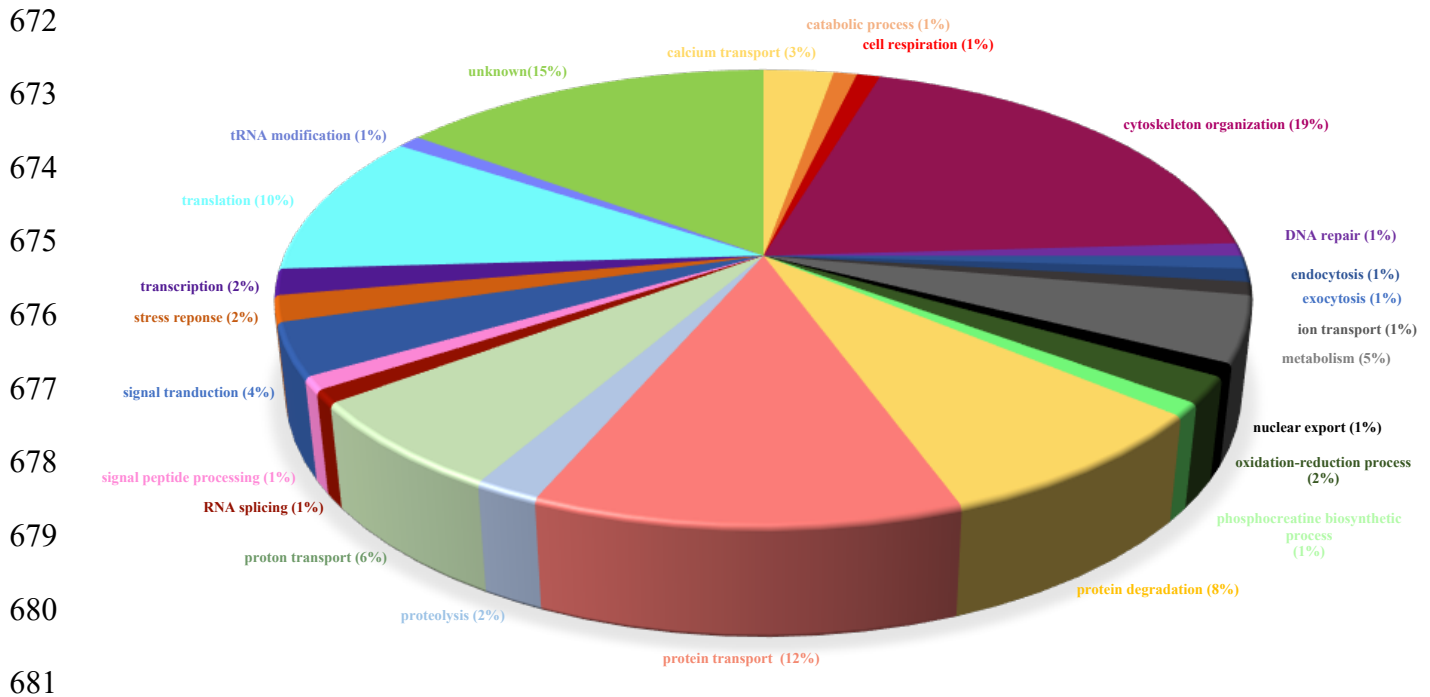

682 **Fig 3: Biological processes involving the proteins identified by Mass spectrometry as**  
683 **SmRho1 partners.**

684 Pie chart showing the biological processes in which the identified protein partners of SmRho1  
685 are involved. The processes were defined using the Blast2GO software. Two independent co-  
686 immunoprecipitation (Co-IP) experiments were performed and grouped into one graphic  
687 display.

688

689 **SmRho1 interacts with SmHDAC8 and is acetylated on lysine K136 in *S. mansoni***

690 To confirm *in vivo* the direct interaction between SmHDAC8 and SmRho1 shown by  
691 Y2H screening [15], we performed co-immunoprecipitation (CoIP) experiments on adult  
692 worms (Fig 4A) and schistosomula (Fig 4B). Using anti-SmHDAC8 and SmRho1 antibodies,  
693 endogenous proteins were reciprocally and mutually immunoprecipitated and identified by  
694 Western blotting. This result is consistent with protein-protein interaction between  
695 SmHDAC8 and SmRho1 in *S. mansoni* parasites (Fig 4).

696 Nano LC-MS/MS analysis showing a mass increment of 42 Da corresponding to the presence  
697 of an acetyl group on lysine 136 of the TKQLPVTFNEGK peptide of SmRho1 was observed.  
698 This may suggest that SmRho1 could be a substrate for SmHDAC8 (Fig 5), but this remains  
699 to be investigated. Although human RhoA and other RhoGTPases are not acetylated, Hong  
700 and coworkers identified an acetylation of *S. japonicum* Rho1 on lysine 141 [23]. This residue  
701 K141 is absent in SmRho1, and another target residue K136 in SmRho1 is apparently not  
702 acetylated in SjRho1. It should also be borne in mind that only one of the two isoforms of  
703 SmRho1 may be acetylated.  
704 Interestingly, there are regulatory proteins that could be described as "atypical regulators" of  
705 which SmHDAC8 could be a part. The Memo protein, for example, interacts with RhoA and  
706 appears to promote its membrane localization and therefore its activation, within a Memo-  
707 RhoA-mDia1 multiprotein complex [46]. Hence SmHDAC8 could also be considered as an  
708 atypical regulator of SmRho1 either via direct binding or *via* deacetylation.

709

710

711

712

713

714

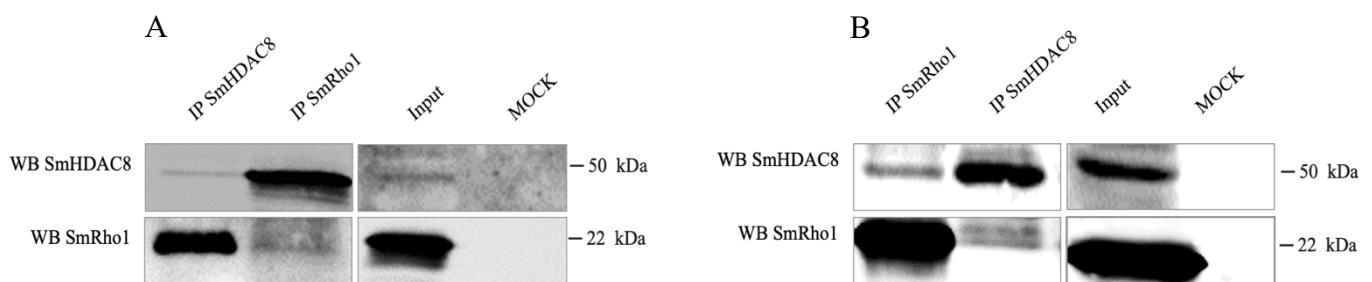

715 **Fig 4: SmHDAC8 interacts with SmRho1 in *S. mansoni* parasites.**

716 Adult worms (A) and schistosomula (B) SmHDAC8 and SmRho1 were respectively  
717 immunoprecipitated using an anti-SmHDAC8 and an anti-SmRho1 antibodies cross-linked to  
718 protein-L agarose beads. The immunoblots were probed with the same antibodies to detect the  
719 SmHDAC8 or SmRho1 protein in the input and eluates. As a negative control, we performed  
720 Co-IP (MOCK) with a mouse IgG antibody alone in each experiment.

721

722

723

724

725

726

727

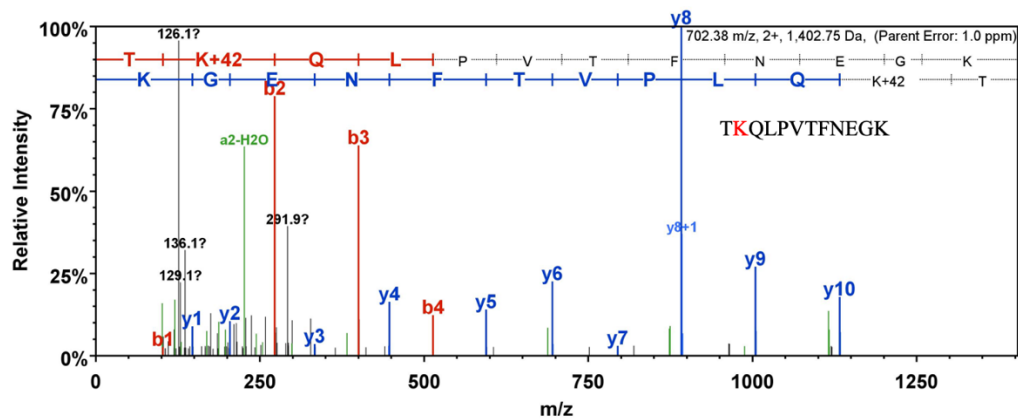

728 **Fig 5: SmRho1 is acetylated on lysine K136.**

729 MS/MS spectrum of the SmRho1 identifying the acetylated peptide TK(Ac)QLPVTFNEGK.

730

731 SmRho1.1 C-terminal moiety binds SmHDAC8

732 To investigate the SmHDAC8–SmRho1 isoforms interaction in more detail, we used the Y2H  
733 system in yeast and *Xenopus laevis* oocytes as heterologous expression systems.

734 In Fig 6A (panel right), we show that only diploid yeasts which expressed SmHDAC8 and  
735 SmRho 1.1. grow on the selective medium SD -Leu/-Trp/-His/-Ade, confirming an interaction  
736 between these two proteins. Moreover, the absence of growth for diploids expressing  
737 SmHDAC8 and SmRho1.2 suggested that the interaction between SmHDAC8 and SmRho1.1  
738 was specific.

739 We next co-expressed SmHDAC8 and SmRho1 isoforms in *Xenopus* oocytes (Fig 6B) to  
740 confirm specific interaction between SmHDAC8 and SmRho1.1 (Fig 6A). We show that  
741 Myc-tagged SmHDAC8 binds HA-tagged SmRho1.1 but not HA-tagged SmRho1.2. To  
742 confirm this specificity of interaction it will necessary in a future study to determine the  
743 interaction between SmHDAC8 and SmRho1 isoforms after IP with SmHDAC8 using adult  
744 worms and schistosomula protein extracts. The SmRho1 protein thus isolated will be analyzed  
745 in mass spectrometry to identify which SmRho1 isoform is present.

746 If only one of the two isoforms of SmRho1 is acetylated, the specific acetylation of  
747 SmRho1.1 and the potential deacetylation by SmHDAC8 could constitute a regulatory  
748 mechanism of the parasite-specific SmRho1-mediated signaling pathway. In addition, the  
749 lysine that we have identified as an acetylation site on SmRho1 is conserved in both isoforms  
750 suggesting that SmRho1 isoforms could be acetylated and deacetylated by the same KDAC.  
751 However, because there is a specific interaction between SmHDAC8 and SmRho1.1, it is  
752 possible that only SmRho1.1 is actually acetylated. Thus, in contrast to human RhoA, a single  
753 protein which plays a central role in the signaling pathway regulating the organization of the  
754 actin cytoskeleton and the microtubular network *via* various partners, *S. mansoni*, SmRho1  
755 isoforms, by different interactions, could have evolved specific and separate functions.

756 Based on the specificity of interaction between SmHDAC8 and SmRho1.1 and in  
757 order to determine the segments of SmRho1.1 responsible for this interaction, various  
758 SmRho1 mutant proteins were produced by site-directed mutagenesis. Protein sequence  
759 alignments of SmRho1.1 and SmRho1.2 showed that there were only 7 different amino acids  
760 between the two isoforms (Fig 1B). These mutations are mainly located in the C-terminal part  
761 of the protein. In the N-terminal part, only the glutamic acid at position 33 of SmRho1.1 is  
762 substituted by a lysine in SmRho1.2.

763 Two N-terminal fragments of different sizes were therefore produced, by insertion of  
764 premature stop codon, using SmRho1.1 in order to identify the domain binding to SmHDAC8  
765 (Fig 6C). In parallel, two other mutant proteins were produced using both SmRho1.1 and  
766 SmRho1.2 as templates. The glutamic acid at position 33 of SmRho1.1 was substituted by a  
767 lysine (SmRho1.1 E33K). Similarly, the lysine at position 33 of SmRho1.2 was replaced by a  
768 glutamic acid (SmRho1.2 K33E) (Fig 6C). We co-expressed SmHDAC8 and SmRho1  
769 mutants in *Xenopus* oocytes (Fig 6D) and we showed that Myc-tagged SmHDAC8 interacts

770 with HA-tagged SmRho1.1E33K but not with SmRho1.2 K33E. These substitutions therefore  
771 failed to change the binding behavior, compared to the SmRho1 wild type isoforms.

772 In addition, we have shown that HA-tagged SmRho1 N-terminal fragments cannot interact  
773 with Myc-tagged SmHDAC8 (Fig 6D) suggesting that the SmRho1.1 C-terminal moiety is  
774 involved in the binding to SmHDAC8. However, it is also possible that the SmRho1.1  
775 fragments could be misfolded, inducing a loss of protein function and their ability to interact  
776 with SmHDAC8.

777 In consequence, we performed point mutations using SmRho1.1 and SmRho1.2 to identify  
778 specific residues involved in the interaction with SmHDAC8. Using site-directed  
779 mutagenesis, the glutamine Q147 and the valine V148 of SmRho1.1 were substituted by a  
780 glutamic acid and a methionine (SmRho1.1 EM) and then the lysine K151 and the serine  
781 S153 by two asparagines (SmRho1.1 EMNN) (S5 Fig A). We also produced SmRho1.2 QV  
782 and SmRho1.2 QVKS mutants by site-directed mutagenesis using the SmRho1.2 protein as  
783 template (S5 Fig A). We then co-expressed the resulting mutant proteins in *Xenopus* oocytes.  
784 CoIP experiments revealed that none of the SmRho1.1 and SmRho1.2 mutants (HA-tagged)  
785 were able to bind SmHDAC8 (Myc-tagged) (S5 Fig B). In conclusion, the mutations we  
786 carried out to SmRho1.2 are incapable of restoring the interaction between SmHDAC8 and  
787 SmRho1.2, suggesting that all seven amino acids differentiating the two isoforms are  
788 potentially involved in the interaction with SmHDAC8.

789

790

791

792

793

794



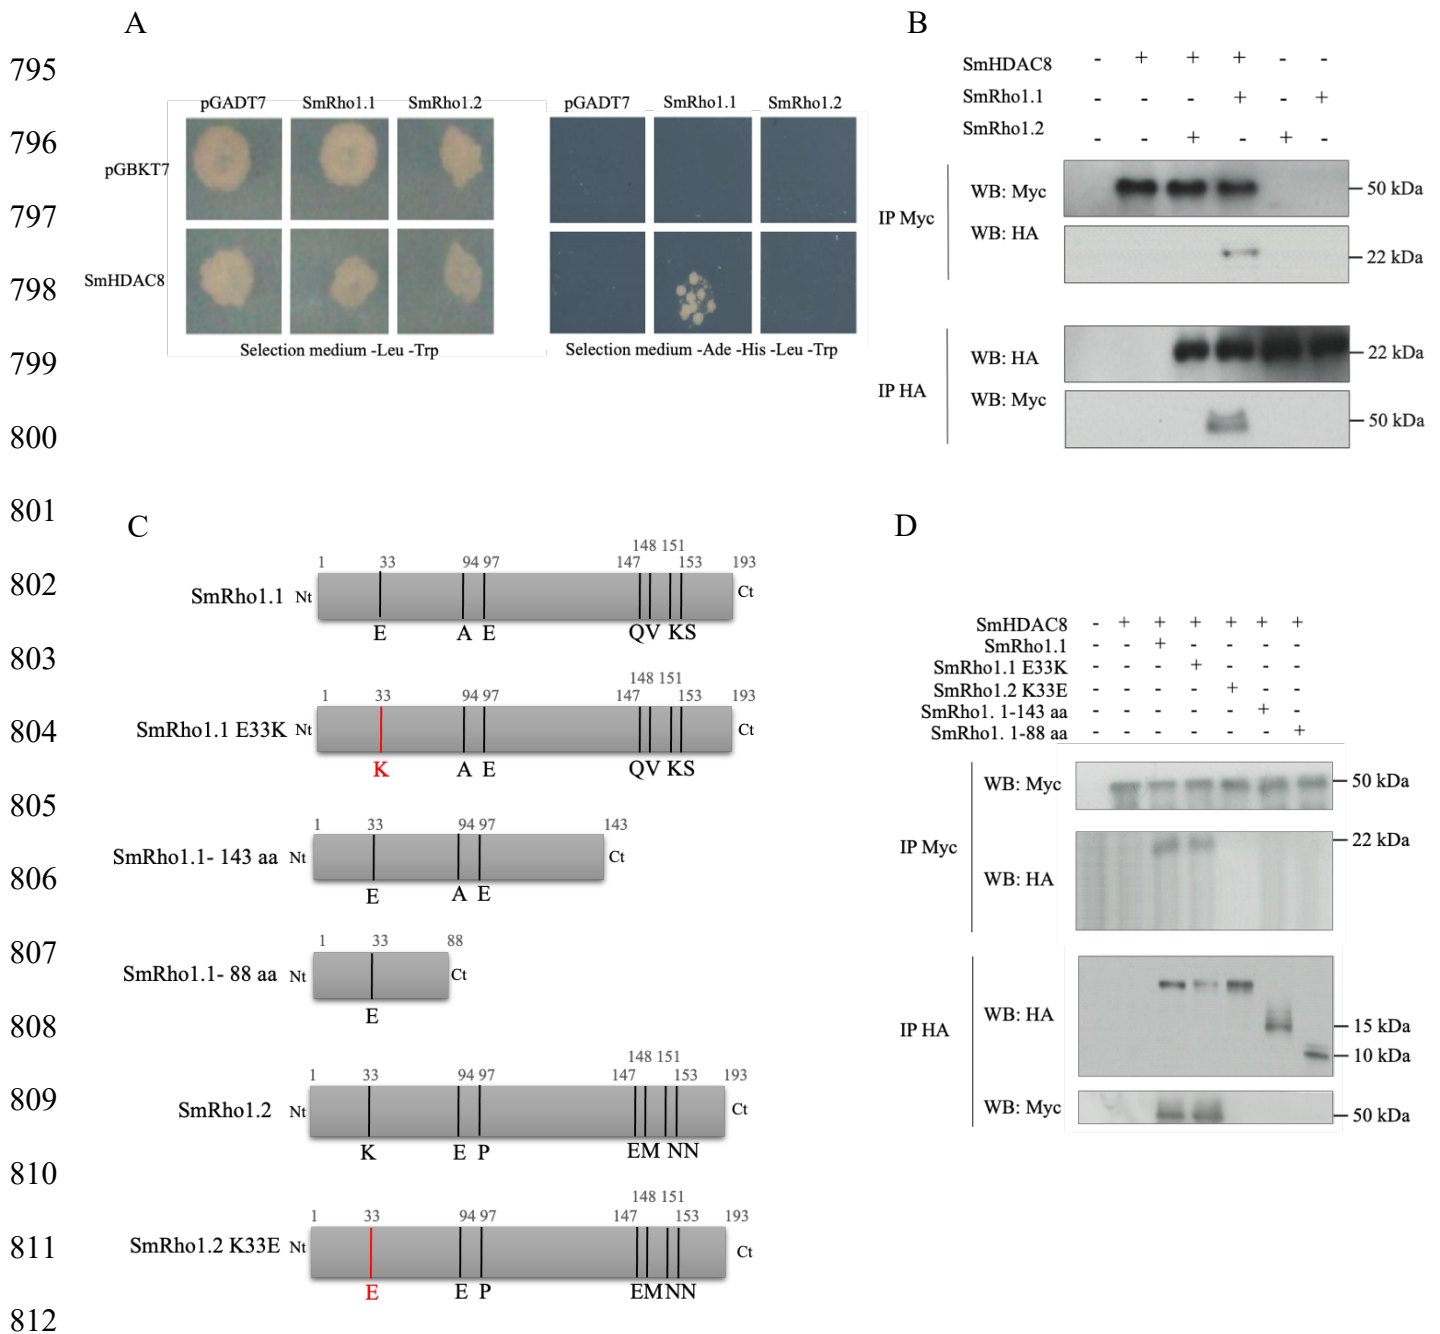

813 **Fig 6:**

814 **SmHDAC8 binds SmRho1.1 but not SmRho1.2.**

815 (A) Y2H mating experiments showed that SmHDAC8 interacts specifically with SmRho1.1  
 816 protein. AH109 yeasts expressing only Gal4AD (pGADT7) or Gal4AD-fused SmRho1.1 or  
 817 SmRho1.2 were mated with Y187 yeasts expressing only Gal4DBD (pGBKT7) or Gal4DBD-  
 818 fused SmHDAC8. Diploids were streaked on a minimal SD -Leu/-Trp medium and diploids  
 819 expressing interacting proteins were then selected on SD -Leu/-Trp/-His/-Ade medium.

820 (B) Co-immunoprecipitation and Western Blot analysis of SmHDAC8 and SmRho1 isoforms  
821 expressed in *Xenopus* oocytes showed an interaction only between SmHDAC8 (Myc-tagged)  
822 and SmRho1.1 (HA-tagged). cRNAs encoding HA-tagged SmRho1.1 or SmRho1.2 were co-  
823 injected in *Xenopus* oocytes with cRNA encoding Myc-tagged SmHDAC8. Oocytes were  
824 incubated in ND96 medium and lysed. Proteins from soluble extracts were  
825 immunoprecipitated (IP) by anti-HA or anti-Myc antibodies and analyzed by Western Blot  
826 (WB) to detect SmHDAC8 (50 kDa) and SmRho1 isoforms (22 kDa) with anti-Myc or anti-  
827 HA antibodies.

828

829 **The interaction between SmRho1.1 and SmHDAC8 is dependent on the SmRho1.1 C-**  
830 **terminus.**

831 (C) Schematic structure of SmRho1.1 and SmRho1.2 mutants. Using site-directed  
832 mutagenesis, the glutamic acid Glu33 of SmRho1.1 was substituted by a lysine (SmRho1.1  
833 E33K) and the lysine Lys33 of SmRho1.2 by a glutamic acid (SmRho1.2 K33E). SmRho1. 1-  
834 143 aa and SmRho1. 1-88 aa proteins are portions of SmRho1.1. produced by site-directed  
835 mutagenesis.

836 (D) Co-immunoprecipitation and Western Blot experiments performed in *Xenopus* oocytes  
837 revealed that SmRho1. 1-143 aa and SmRho1. 1- 88 aa mutants (HA-tagged) are not able to  
838 bind SmHDAC8 (Myc -tagged). cRNAs encoding HA-tagged SmRho1 isoforms, SmRho1.1  
839 mutant or SmRho1.2 mutants were co-injected in *Xenopus* oocytes with cRNA encoding  
840 Myc-tagged SmHDAC8. Oocytes were incubated in ND96 medium and lysed. Proteins from  
841 soluble extracts were immunoprecipitated (IP) by anti-HA or anti-Myc antibodies and  
842 analyzed by Western Blot (WB) to detect SmHDAC8 (50 kDa), SmRho1 isoforms (22 kDa)  
843 or SmRho1 mutants (22kDa) with anti-Myc or anti-HA antibodies.

844

845 SmRho1.2 interacts specifically with SmDia

846 Because we have shown specific interaction between SmHDAC8 and SmRho1.1 in yeast and  
847 *Xenopus* oocytes suggesting that each isoform could have specific partners, we investigated  
848 the interaction between SmRho1 isoforms and Rho Binding Domain of SmDia (SmDia-RBD)  
849 [24] using Y2H system in yeast and *Xenopus laevis* oocytes.

850 We show, in Fig 7A, that only diploid yeasts that express SmRho1.2 and SmDia-RBD grow  
851 on the selective medium SD -Leu/-Trp/-His/-Ade, indicating an interaction between these two  
852 proteins. In order to confirm the specific interaction between SmRho1.2 and SmDia-RBD  
853 (Fig 7B), we co-expressed SmRho1 isoforms and SmDia-RBD in *Xenopus* oocytes. This  
854 shows that Myc-tagged SmDia-RBD specifically binds HA-tagged SmRho1.2.

855 The observation that only SmRho1.1 can bind SmHDAC8, and that only SmRho1.2 can bind  
856 SmDia, suggests that these isoforms have developed distinct functions. This implies that there  
857 are two very distinct pathways that participate in the organization of the cytoskeleton *via* the  
858 two isoforms of SmRho1. Thus, only the SmRho1.1 isoform should interact with SmROCK  
859 for example, but this requires demonstration.

860 Although SmDia interacts specifically with SmRho1.2, we have no knowledge of how the  
861 SmRho1.2-SmDia complex could participate in the regulation of the polymerization of actin  
862 filaments. However, in 2009, Quack and coworkers demonstrated that SmDia is able to  
863 interact directly with the SmTK3 protein (Src-like Tyrosine-Kinase). Moreover, in human, the  
864 RhoA-GTP/ mDia/Scr complex is known to regulate the formation of actin filaments [45, 46].  
865 A model summarizing the different pathways putatively regulated by the SmRho1 isoforms is  
866 shown in Fig 10.

867

868

869

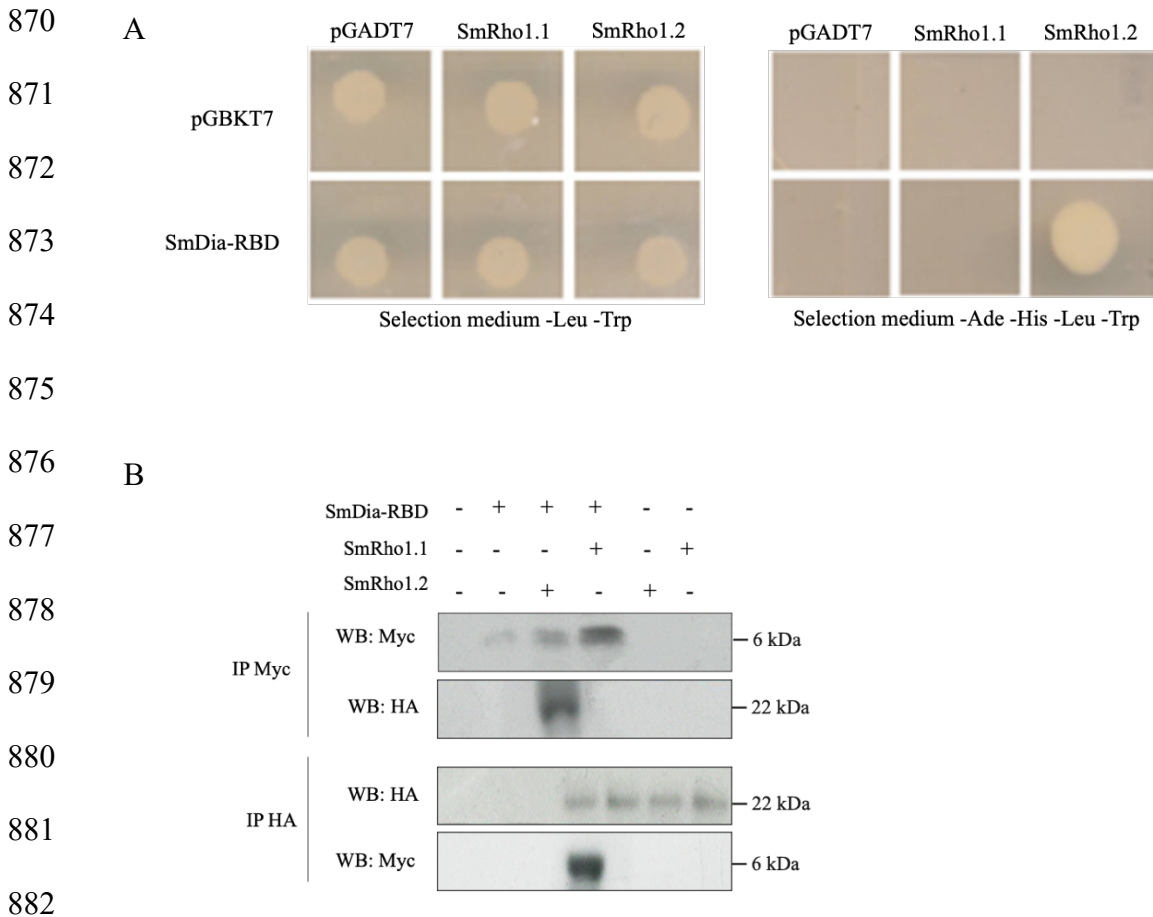

883 **Fig 7: SmDia binds SmRho1.2 but not SmRho1.1**

884 (A) Y2H mating experiments showed that SmDia-RBD (Rho Binding Domain) interacts

885 specifically with SmRho1.2 protein. AH109 yeasts expressing only Gal4AD (pGADT7) or

886 Gal4AD-fused SmRho1.1 or SmRho1.2 were mated with Y187 yeasts expressing only

887 Gal4DBD (pGBKT7) or Gal4DBD-fused SmDia-RBD. Diploids were streaked on a minimal

888 SD -Leu/-Trp medium and diploids expressing interacting proteins were then selected on SD -

889 Leu/-Trp/-His/-Ade medium.

890 (B) Co-immunoprecipitation and Western Blot analysis of SmDia-RBD and SmRho1

891 isoforms expressed in *Xenopus* oocytes showed an interaction only between SmDia-RBD

892 (Myc-tagged) and SmRho1.2 (HA-tagged). cRNAs encoding HA-tagged SmRho1.1 or

893 SmRho1.2 were co-injected in *Xenopus* oocytes with cRNA encoding Myc-tagged SmDia-

894 RBD. Oocytes were incubated in ND96 medium and lysed. Proteins from soluble extracts

895 were immunoprecipitated (IP) by anti-HA or anti-Myc antibodies and analyzed by Western  
896 Blot (WB) to detect SmDia-RBD (6 kDa) and SmRho1 isoforms (22 kDa) with anti-Myc or  
897 anti-HA antibodies.

898

899 SmHDAC8 inhibition or knockdown cause disruption of the parasite actin cytoskeleton.

900 Finally, to elucidate the role of SmHDAC8 in the regulation of cytoskeleton dynamics, we  
901 examined the impact of SmHDAC8 inhibition on the organization of the actin network of  
902 parasite tegument using both RNAi and selective inhibitors (Fig 8-9).

903 Adult worms and schistosomula were first treated with a selective SmHDAC8 inhibitor, TH65  
904 [49], then stained with DAPI and Alexa488 conjugated phalloidin (Fig 8, 9, S3, S4). As  
905 reference, we used parasites treated with trichostatin A (TSA) which inhibits both class I and  
906 II mammalian histone deacetylases (Fig 8A, 9A, S3). In parallel, we used an RNAi  
907 complementary approach to target transcripts encoding SmHDAC8 (Fig 8B, 9C, S4).

908 In adult worms, the TH65 inhibitor did not induce a significant disorganization of tegumental  
909 actin (Fig 8A, S3). Indeed, phalloidin, which binds to actin filaments, was detected in spines  
910 and tegumental cells. Actin filaments appeared as horizontal and vertical straight lines  
911 stretching across the whole thickness of the tegumental syncytium (Fig 8A and S3). We can,  
912 however, observed that TH65 seems to impact the structure of the spines. (Fig 8A and S3).  
913 Moreover, no significant effects were observed in adult worms after treatment with TSA (Fig  
914 8A and S3) or *Smhdac8* interference (Fig 8B and S4).

915 On the contrary, schistosomula treated with TH65 and TSA are highly affected at various  
916 levels and for some of the parasites, we observed a strong phenotype with defective muscular  
917 actin organization (Fig 9A). In control parasites (Fig 9A-B: DMSO section), phalloidin  
918 staining reveals higher-order actin structures, forming a three-dimensional actin network. In  
919 treated parasites (Fig 9A-B, TH65 and TSA section), we observed that the actin network

920 structure was disrupted after inhibitor treatment with a modification of actin filament structure  
921 or absence of F-actin.

922 While dsRNA promoted only 22% silencing of the *SmHDAC8* gene, in schistosomula this  
923 nevertheless led to a significant effect on actin cytoskeleton organization (Fig 9C), similar to  
924 that observed after inhibitor treatment (Fig 9C-D). This suggests that the effects of TH65 were  
925 indeed due to selective inhibition of SmHDAC8.

926 In order to confirm the involvement of SmHDAC8 in the SmRho1 signaling pathway, we  
927 treated parasites with Rho inhibitor I (Fig 8A and 9A), used to selectively inactivate the  
928 human GTPases RhoA, RhoB, and RhoC by ADP-ribosylation on asparagine 41, which is  
929 conserved in SmRho1 isoforms, and we used RNAi to knock down *SmRho1* (Fig 8B and 9C).  
930 In adult worms, inhibition and silencing of *SmRho1* did not significantly affect actin network  
931 organization but in schistosomula, we observed a very similar phenotype to that obtained after  
932 inhibition and KO of *SmHDAC8*.

933 Taken together, these findings suggest that SmHDAC8 is involved in regulation of actin  
934 cytoskeleton organization in *S. mansoni*, more evidently in schistosomula. However, the  
935 robust silencing and inhibition of SmHDAC8 in adult worms did not result in any significant  
936 phenotypic changes. This may be due to a more active turnover of the actin cytoskeleton in  
937 the larvae compared to adult worms. It should be noted that TH65 causes inhibition of the  
938 deacetylation activity of SmHDAC8 enzyme but does not affect protein expression.

939 Because SmHDAC8 has multiple interactants, we cannot nevertheless conclude that the  
940 observed phenotypes are the consequence of deregulation of a signaling pathway jointly  
941 mediated by SmRho1 and SmHDAC8. Indeed, an identified HsHDAC8 substrate is cortactin  
942 which contributes to the organization of the F-actin cytoskeleton. It was shown that cortactin-  
943 actin interaction is regulated by (de)acetylation and HsHDAC8 seems to influence smooth  
944 muscle contraction [44, 45].

945 In future work we can also consider determining the impact of inhibition of SmHDAC8 on the  
946 microtubular network and perform staining experiments after SmHDAC8 inhibition and KO  
947 using TH65 and RNAi. In 2011, Yamauchi et al. showed that the interference of transcripts  
948 encoding human HDAC8 using siRNA disrupted the microtubule network of cells [52].

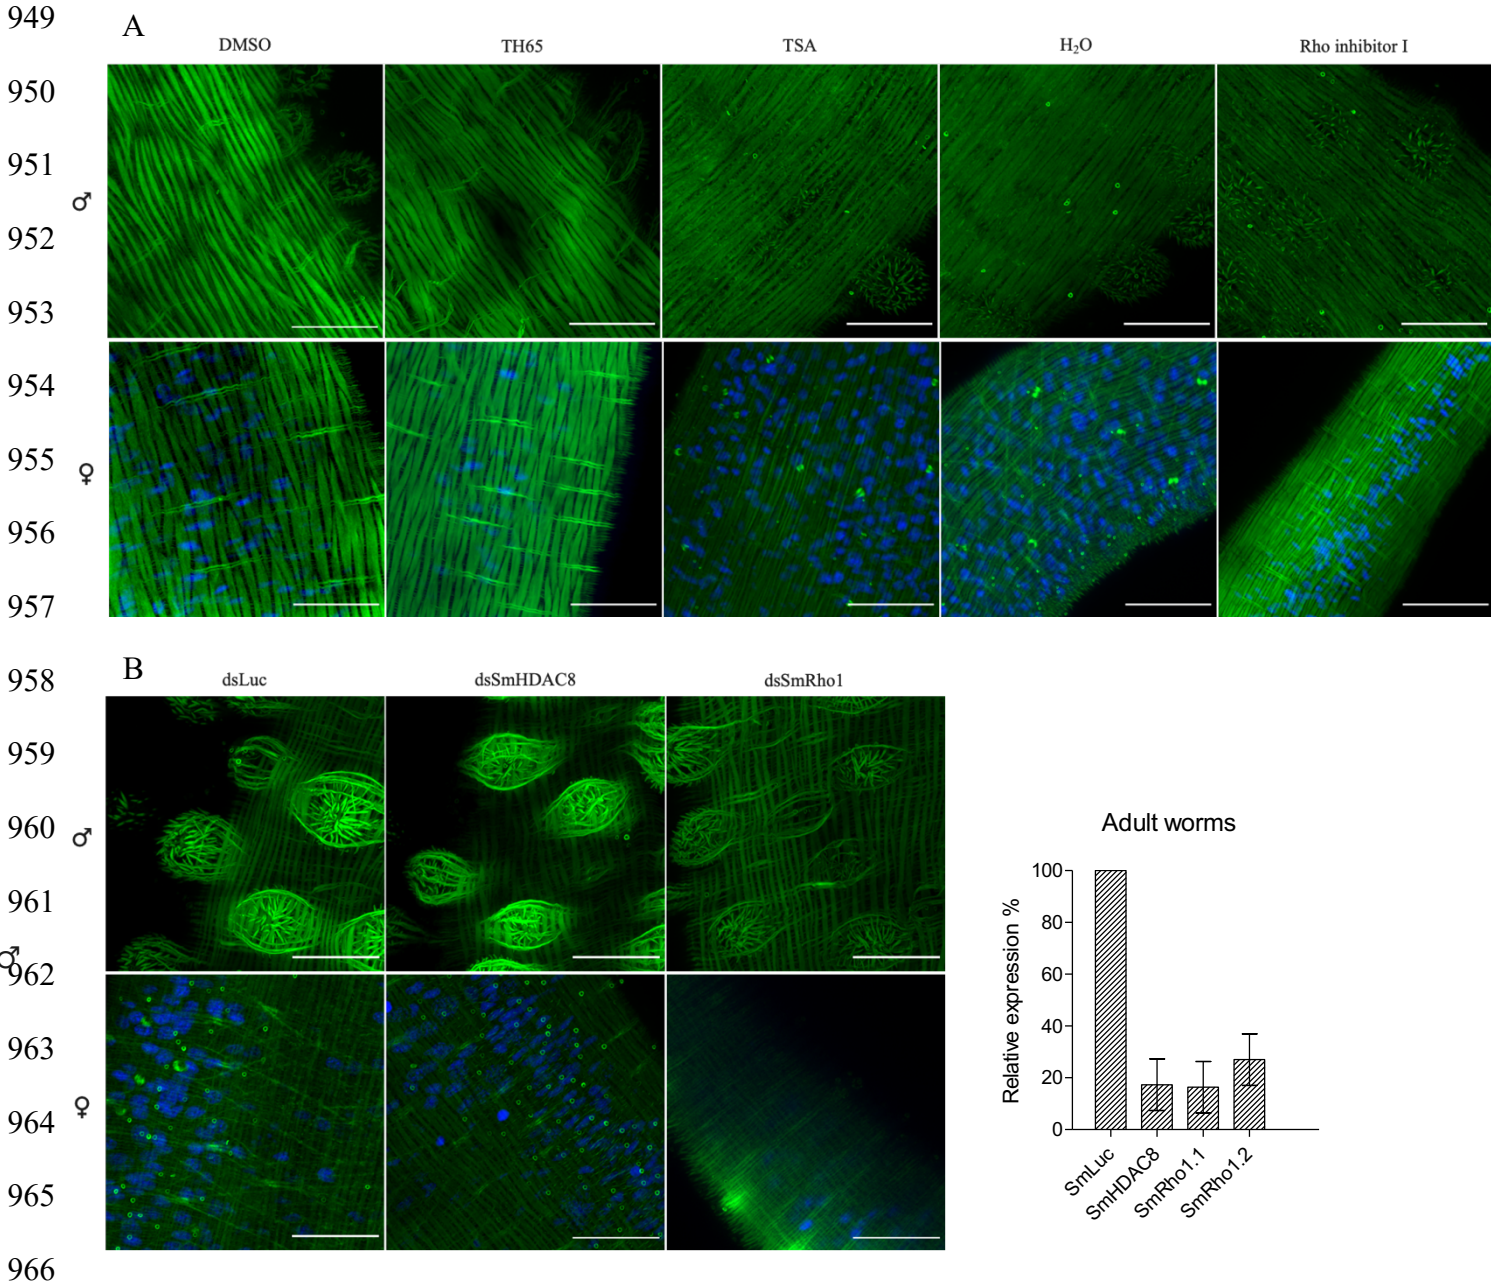

970 TH65 or 10  $\mu$ M of TSA, then fixed and stained with phalloidin and DAPI. H<sub>2</sub>O and DMSO  
971 were used as negative controls. As a positive control, schistosomula were treated with a Rho  
972 inhibitor I (4  $\mu$ g. mL<sup>-1</sup>). Scale bar represent 20  $\mu$ m, magnification, x630.

973 (B) Effect of *SmHDAC8* transcript knockdown in adult worms. RNA interference was carried  
974 out by *S. mansoni* worms with dsRNA for *SmHDAC8*, *SmRho1* (positive control) or  
975 *luciferase* (negative control) as described in the Methods section. Actin-F was revealed with  
976 phalloidin staining and the nuclei were stained with DAPI. Microscopic examination was  
977 carried out 5 days after RNAi treatment. Scale bar represent 20  $\mu$ m, magnification, x630.

978 RT-qPCR results of RNAi treatment with dsRNA of *SmLuc*, dsRNA of *SmHDAC8* or dsRNA  
979 of *SmRho1* and analyses of relative transcript levels of *SmHDAC8*, *SmRho1.1* or *SmRho1.2* in  
980 adult worms. *SmPSMB7* was used as an internal reference gene. The results were analyzed  
981 using the 2<sup>- $\Delta\Delta$ CT</sup> method.

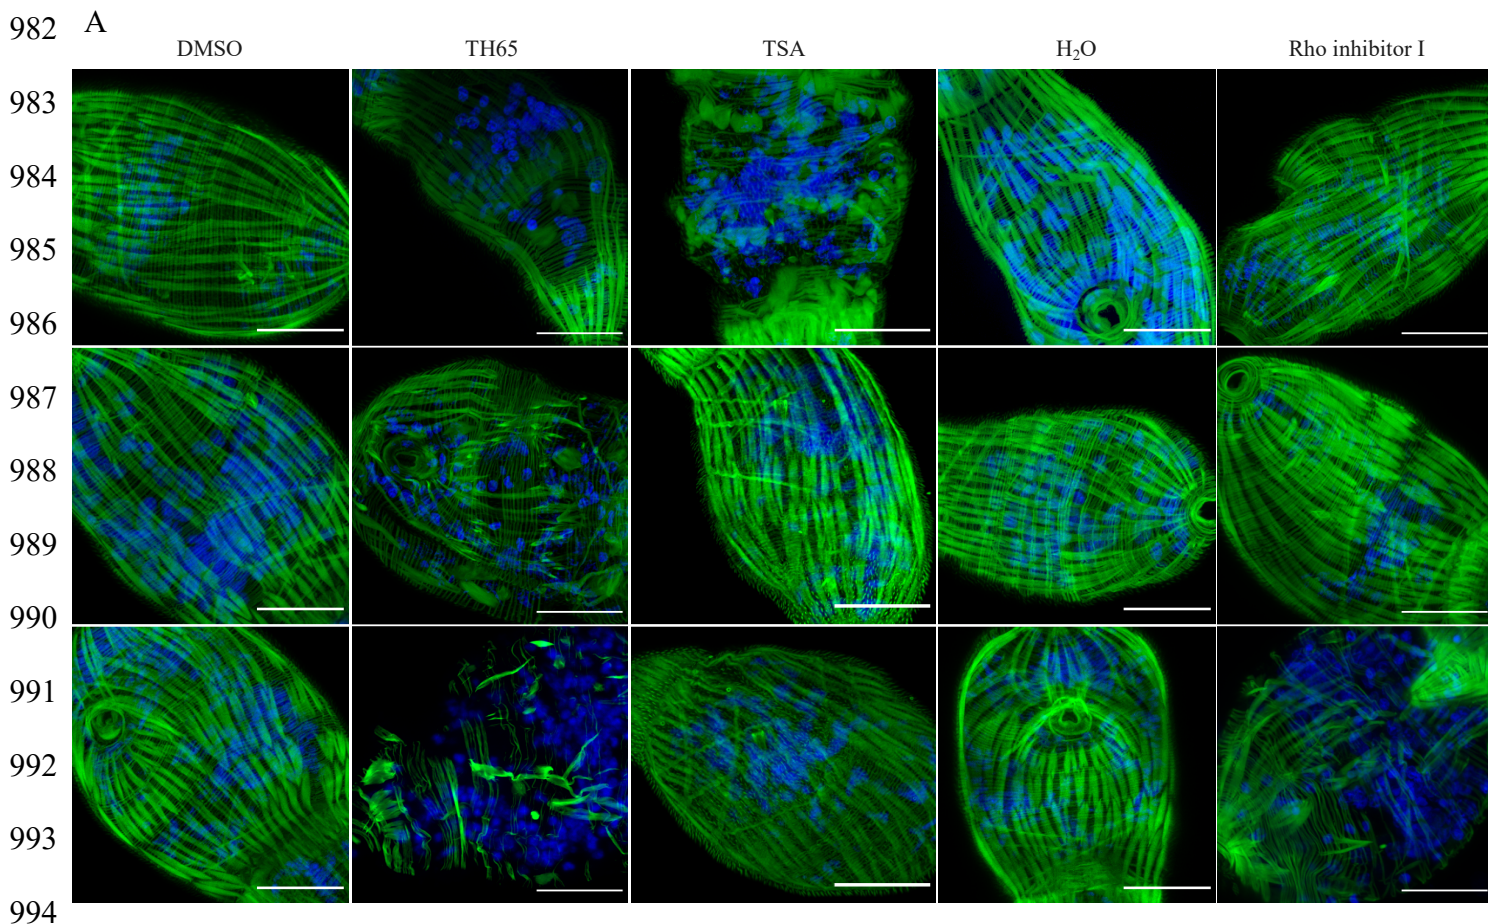



995

B

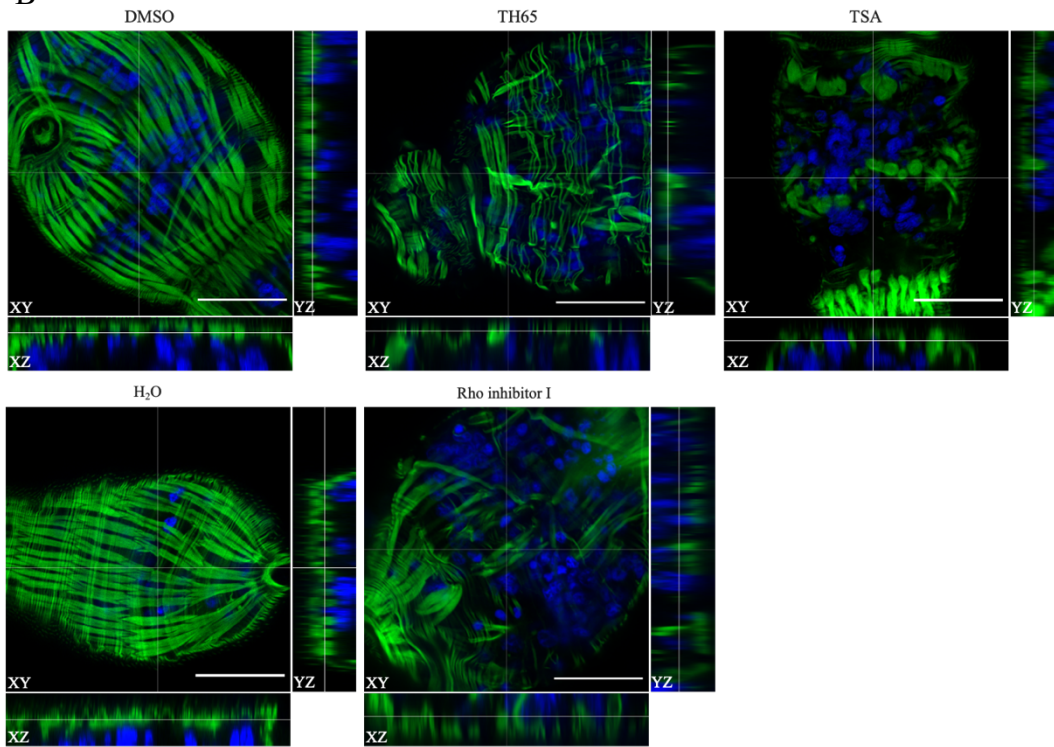

996

997

998

999

1000

1001

1002

1003

1004

1005

1006

C

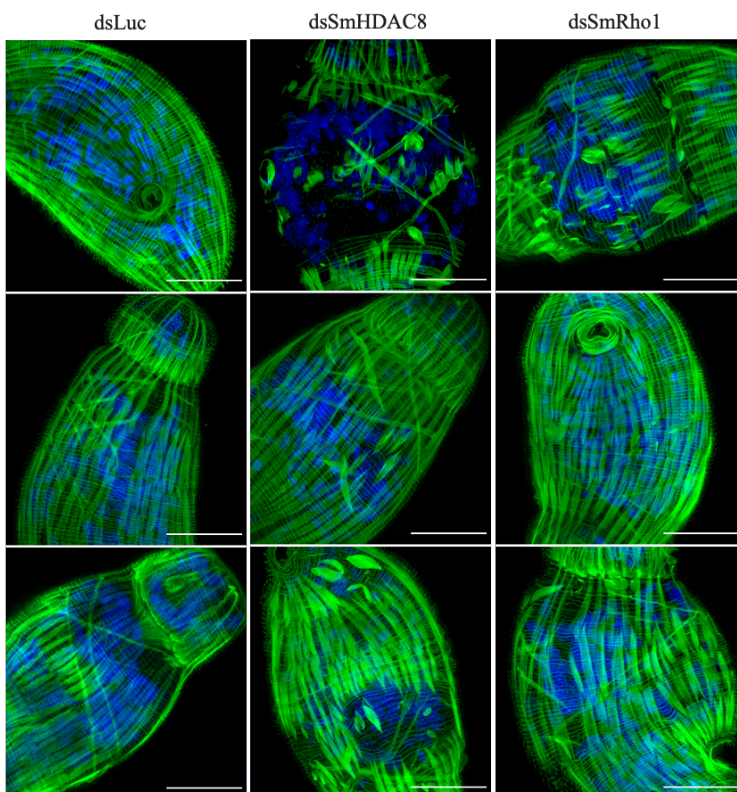

1007

1008

1009

1010

1011

1012

1013

1014

1015

1016

1017

1018

1019

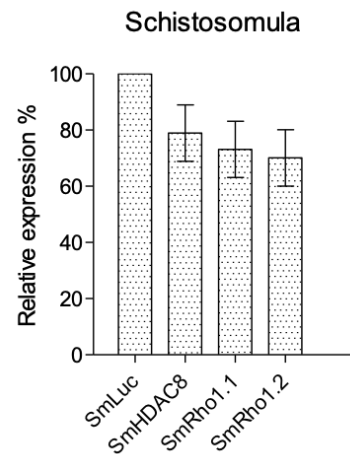

1020  
1021  
1022  
1023  
1024  
1025  
1026

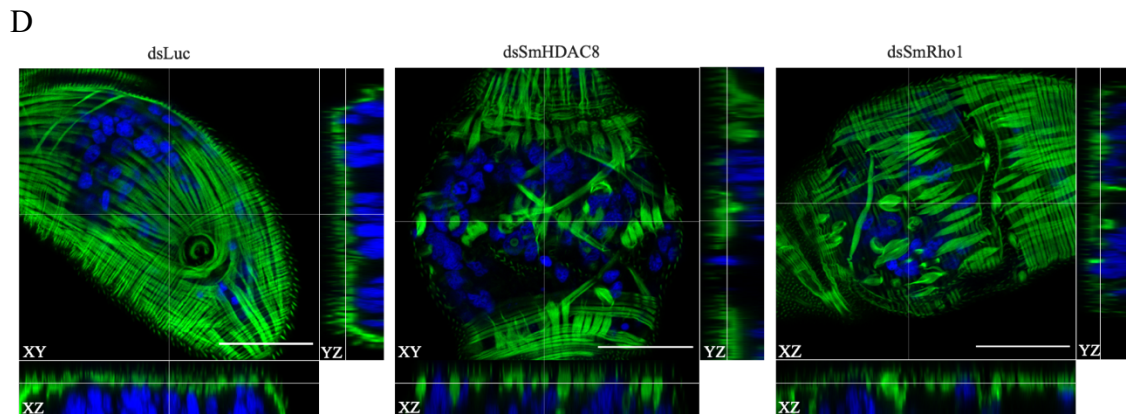

1027 **Fig 9: Effect of SmHDAC8 inhibition on actin filaments of *S. mansoni* schistosomula.**

1028 (A) Effect of SmHDAC8 inhibition in schistosomula. Airyscan microscopy images taken of  
1029 schistosomula treated for 16 hours with a SmHDAC8 selective inhibitor (TH65), at 50 $\mu$ M and  
1030 a pan-inhibitor (TSA) at 3  $\mu$ M. Parasites treated with DMSO or H<sub>2</sub>O were used as negative  
1031 controls. As a positive control, schistosomula were treated with a Rho inhibitor I (2 $\mu$ g. mL<sup>-1</sup>).  
1032 Actin-F was revealed with phalloidin staining. The nuclei were stained with DAPI. Results  
1033 shown are representative of three independent experiments. Scale bars represent 20  $\mu$ m,  
1034 magnification, x630.

1035 (B) Airyscan images with orthogonal views of treated *S. mansoni* schistosomula. Results  
1036 shown are from one experiment. Scale bar represent 20  $\mu$ m, magnification, x630.

1037 (C) Effect of *SmHDAC8* transcript knockdown in schistosomula. RNA interference was  
1038 carried out by schistosomula with dsRNA for *SmHDAC8*, *SmRho1* (positive control) or  
1039 *luciferase* (negative control) as described in the Methods section. Actin-F was revealed with  
1040 phalloidin staining and the nuclei were stained with DAPI. Microscopic examination was  
1041 carried out 2 days after RNAi treatment. Scale bar represent 20  $\mu$ m, magnification, x630.

1042 RT-qPCR results of RNAi treatment with dsRNA of *SmLuc*, dsRNA of *SmHDAC8* or dsRNA  
1043 of *SmRho1* and analyses of relative transcript levels of *SmHDAC8*, *SmRho1.1* or *SmRho1.2* in

1044 schistosomula. *SmPSMB7* was used as an internal reference gene. The results were analyzed  
1045 using the  $2^{-\Delta\Delta CT}$  method.

1046 (D) Airyscan images with orthogonal views of *S. mansoni* schistosomula. Results shown are  
1047 from one experiment. Scale bars represent 20  $\mu\text{m}$ , magnification, x630.

1048

1049 **Conclusion:**

1050 In the present study, we have confirmed SmRho1 as a partner and potential substrate  
1051 of SmHDAC8 and provided evidence that the latter is involved in the regulation of the actin  
1052 cytoskeleton in *S. mansoni*. The use of selective inhibitors of SmHDAC8 and SmRho, as well  
1053 as knockdown of their transcripts using RNAi, strongly suggests that both proteins are  
1054 involved in maintaining the integrity of the actin cytoskeleton. Following our initial  
1055 identification of SmRho1 as a potential partner for SmHDAC8, we have consolidated the  
1056 demonstration of this interaction, both *in vitro* and within the parasite using co-  
1057 immunoprecipitation studies. Our data demonstrated that SmHDAC8-SmRho1 interaction  
1058 involves the C-terminal domain of SmRho1.1. However, our attempts to “transform”  
1059 SmRho1.2 into SmRho1.1 *via* limited site-directed mutagenesis were unsuccessful, and  
1060 suggest that the entire interaction interface formed by the amino acid residues that differ  
1061 between the two isoforms is responsible for this difference in interaction. The selective  
1062 interaction of SmRho1.2 with SmDia suggests that there are two distinct signaling pathways  
1063 mediated by SmRho1.1 and SmRho1.2, but this remains to be confirmed. Moreover, although  
1064 our results argue for a direct interaction between the SmRho1 isoforms and its partners, it  
1065 should be borne in mind that the effects of inhibition and RNAi observed in the parasite may  
1066 reflect the involvement of multi-protein complexes. Nevertheless, the detection of the  
1067 acetylation of SmRho1 raises the possibility that it is a substrate of SmHDAC8 and that  
1068 acetylation, could be involved in the modulation of the properties of SmRho1. Tools like

1069 CRISPR-Cas9, would allow us to obtain conditional KO or KO parasites in order to study the  
 1070 specific role of *SmRho1* genes at different parasitic stages. Although this is not currently  
 1071 possible, projects concerning the development of CRISPR-Cas9 technology in schistosome  
 1072 are underway [52]

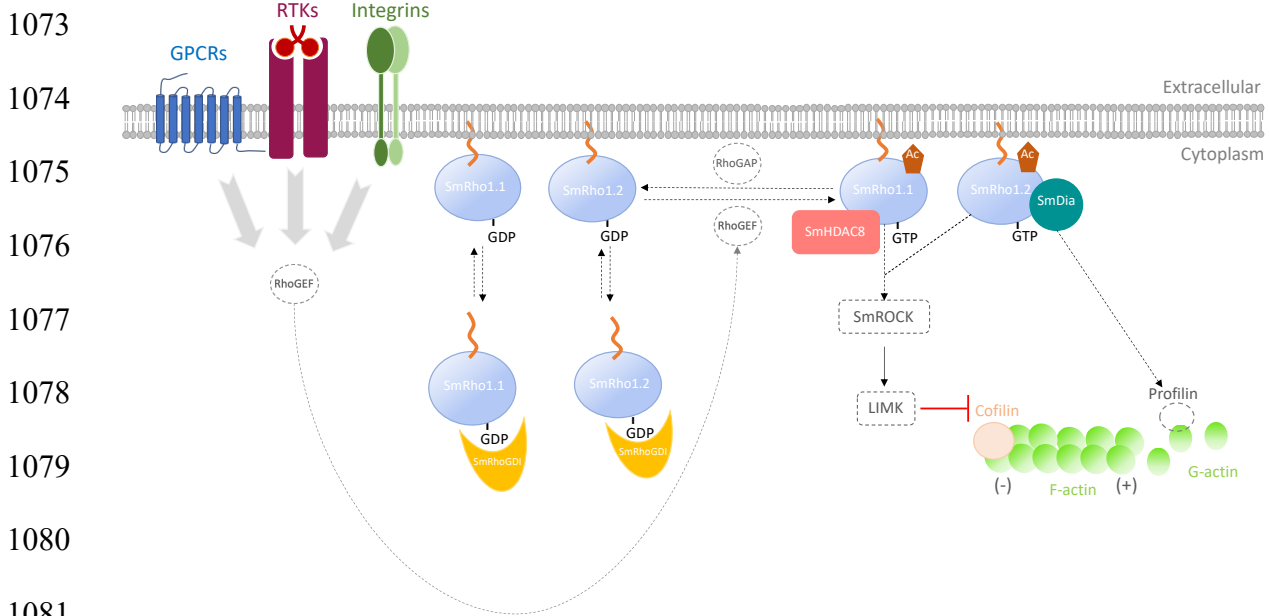

1082 **Fig 10: Model of signaling pathways involving SmHDAC8 and SmRho1 isoforms in**  
 1083 **cytoskeleton organization.** We propose the existence of two signaling pathways in *S.*  
 1084 *mansoni* involving the two SmRho1 isoforms, one involving SmRho1.1 the lysine deacetylase  
 1085 SmHDAC8 and the other implicating SmRho1.2 and SmDia, to organize cytoskeletal events  
 1086 in adult worms and schistosomula.

1088 **Acknowledgements**

1089 This work and the authors of this manuscript have been supported by funding from the  
 1090 European Union's Seventh Framework Programme for research, technological development  
 1091 and demonstration under grant agreement no. 602080 (A-ParaDDisE). Support for the work  
 1092 was also provided by institutional funds from the CNRS, the Institut Pasteur de Lille and Lille  
 1093 University. The authors wish to thank Jacques Trolet for his technical support, Pr. Christoph

1094 Greveling for providing the SmDia-RDB construct and Dr. Christophe ROMIER for  
1095 providing the pnEA-tH bacterial expression plasmid.

1096

1097 **Author contributions**

1098 **Lucile Pagliazzo**, Conceptualization, Investigation, Project administration, Resources,  
1099 Visualization, Writing-original draft, Writing – review & editing; **Stéphanie Caby**,  
1100 Conceptualization, Investigation, Project administration, Resources, Visualization, Writing-  
1101 review & editing; **Julien Lancelot**, Investigation, Resources, Visualization, Writing –  
1102 review & editing; **Sophie Salomé-Desnoullez**, Microscopy analysis, Investigation,  
1103 Validation, Writing – review & editing; Jean-Michel Saliou, Mass-spectrometry  
1104 proteomic analysis, Investigation, Validation, Writing – review & editing; **Thierry**  
1105 **Chassat**, production of SmRho1 antibodies, Investigation, Validation; **Katia Cailliau**,  
1106 *Xenopus* oocytes experiment, Investigation, Validation, Writing – review & editing;  
1107 **Jérôme Vicogne**, Validation, Writing – review & editing; **Raymond J. Pierce**,  
1108 Conceptualization, Funding acquisition, Project administration, Supervision,  
1109 Validation, Writing – review & editing.

1110

1111

1112 **References**

- 1113 1. Gryseels B, Polman K, Clerinx J, Kestens L. Human schistosomiasis. Lancet. 2006.  
1114 doi:10.1016/S0140-6736(06)69440-3
- 1115 2. Utzinger J, Keiser J. Schistosomiasis and soil-transmitted helminthiasis: Common  
1116 drugs for treatment and control. Expert Opinion on Pharmacotherapy. 2004.  
1117 doi:10.1517/14656566.5.2.263
- 1118 3. Weerakoon KGAD, Gobert GN, Cai P, McManus DP. Advances in the diagnosis of

- 1119 human schistosomiasis. *Clin Microbiol Rev.* 2015. doi:10.1128/CMR.00137-14
- 1120 4. Siqueira L da P, Fontes DAF, Aguilera CSB, Timóteo TRR, Ângelos MA, Silva  
1121 LCPBB, et al. Schistosomiasis: Drugs used and treatment strategies. *Acta Tropica.*  
1122 2017. doi:10.1016/j.actatropica.2017.08.002
- 1123 5. Doenhoff MJ, Cioli D, Utzinger J. Praziquantel: Mechanisms of action, resistance and  
1124 new derivatives for schistosomiasis. *Current Opinion in Infectious Diseases.* 2008.  
1125 doi:10.1097/QCO.0b013e328318978f
- 1126 6. McManus DP, Dunne DW, Sacko M, Utzinger J, Vennervald BJ, Zhou XN.  
1127 Schistosomiasis. *Nat Rev Dis Prim.* 2018. doi:10.1038/s41572-018-0013-8
- 1128 7. Wolfe AR, Neitz RJ, Burlingame M, Suzuki BM, Lim KC, Scheideler M, et al. TPT  
1129 sulfonate, a single, oral dose schistosomicidal prodrug: In vivo efficacy, disposition  
1130 and metabolic profiling. *Int J Parasitol Drugs Drug Resist.* 2018.  
1131 doi:10.1016/j.ijpddr.2018.10.004
- 1132 8. Caffrey CR. Schistosomiasis and its treatment. *Future Medicinal Chemistry.* 2015.  
1133 doi:10.4155/fmc.15.27
- 1134 9. Bergquist R, Utzinger J, Keiser J. Controlling schistosomiasis with praziquantel: How  
1135 much longer without a viable alternative? *Infectious Diseases of Poverty.* 2017.  
1136 doi:10.1186/s40249-017-0286-2
- 1137 10. Falkenberg KJ, Johnstone RW. Histone deacetylases and their inhibitors in cancer,  
1138 neurological diseases and immune disorders. *Nature Reviews Drug Discovery.* 2014.  
1139 pp. 673–691. doi:10.1038/nrd4360
- 1140 11. Oger F, Dubois F, Caby S, Noël C, Cornette J, Bertin B, et al. The class I histone  
1141 deacetylases of the platyhelminth parasite *Schistosoma mansoni*. *Biochem Biophys Res*  
1142 *Commun.* 2008;377: 1079–1084. doi:10.1016/j.bbrc.2008.10.090
- 1143 12. Dubois F, Caby S, Oger F, Cosseau C, Capron M, Grunau C, et al. Histone deacetylase

- 1144 inhibitors induce apoptosis, histone hyperacetylation and up-regulation of gene  
1145 transcription in *Schistosoma mansoni*. *Mol Biochem Parasitol*. 2009;168: 7–15.  
1146 doi:10.1016/j.molbiopara.2009.06.001
- 1147 13. Marek M, Kannan S, Hauser AT, Moraes Mourão M, Caby S, Cura V, et al. Structural  
1148 Basis for the Inhibition of Histone Deacetylase 8 (HDAC8), a Key Epigenetic Player in  
1149 the Blood Fluke *Schistosoma mansoni*. *PLoS Pathog*. 2013;9.  
1150 doi:10.1371/journal.ppat.1003645
- 1151 14. Heimbürg T, Chakrabarti A, Lancelot J, Marek M, Melesina J, Hauser AT, et al.  
1152 Structure-Based Design and Synthesis of Novel Inhibitors Targeting HDAC8 from  
1153 *Schistosoma mansoni* for the Treatment of Schistosomiasis. *J Med Chem*. 2016;59:  
1154 2423–2435. doi:10.1021/acs.jmedchem.5b01478
- 1155 15. Caby S, Pagliazzo L, Lancelot J, Saliou JM, Bertheaume N, Pierce RJ, et al. Analysis  
1156 of the interactome of *Schistosoma mansoni* histone deacetylase 8. *PLoS Negl Trop Dis*.  
1157 2017;11: 1–15. doi:10.1371/journal.pntd.0006089
- 1158 16. Matozaki T, Nakanishi H, Takai Y. Small G-protein networks: Their crosstalk and  
1159 signal cascades. *Cell Signal*. 2000;12: 515–524. doi:10.1016/S0898-6568(00)00102-9
- 1160 17. Bento CF, Puri C, Moreau K, Rubinsztein DC, Aguilera MO, Berón W, et al. The role  
1161 of membrane-trafficking small GTPases in the regulation of autophagy. *J Cell Sci*.  
1162 2013;126: 1059–69. doi:10.1242/jcs.123075
- 1163 18. Amano M. Formation of Actin Stress Fibers and Focal Adhesions Enhanced by Rho-  
1164 Kinase Formation of Actin Stress Fibers and Focal Adhesions Enhanced by Rho-  
1165 Kinase. *Data Process*. 2010;1308: 1308–1311. doi:10.1126/science.275.5304.1308
- 1166 19. Vermeire JJ, Osman A, LoVerde PT, Williams DL. Characterisation of a Rho  
1167 homologue of *Schistosoma mansoni*. *Int J Parasitol*. 2003;33: 721–731.  
1168 doi:10.1016/S0020-7519(03)00046-8

- 1169 20. Beckmann S, Quack T, Burmeister C, Buro C, Long T, Dissous C, et al. *Schistosoma*  
1170 *mansoni*: Signal transduction processes during the development of the reproductive  
1171 organs. *Parasitology*. 2010. pp. 497–520. doi:10.1017/S0031182010000053
- 1172 21. Li J, Chen S, Cleary RA, Wang R, Gannon OJ, Seto E, et al. Histone deacetylase 8  
1173 regulates cortactin deacetylation and contraction in smooth muscle tissues. *AJP Cell*  
1174 *Physiol*. 2014;307: C288–C295. doi:10.1152/ajpcell.00102.2014
- 1175 22. Olson DE, Udeshi ND, Wolfson NA, Pitcairn CA, Sullivan ED, Jaffe JD, et al. An  
1176 unbiased approach to identify endogenous substrates of “histone” deacetylase 8. *ACS*  
1177 *Chem Biol*. 2014;9: 2210–2216. doi:10.1021/cb500492r
- 1178 23. Hong Y, Cao X, Han Q, Yuan C, Zhang M, Han Y, et al. Proteome-wide analysis of  
1179 lysine acetylation in adult *Schistosoma japonicum* worm. *J Proteomics*. 2016;148: 202–  
1180 212. doi:10.1016/j.jprot.2016.08.008
- 1181 24. Quack T, Knobloch J, Beckmann S, Vicogne J, Dissous C, Grevelding CG. The  
1182 formin-homology protein SmDia interacts with the Src kinase SmTK and the GTPase  
1183 SmRho1 in the gonads of *Schistosoma mansoni*. *PLoS One*. 2009;4.  
1184 doi:10.1371/journal.pone.0006998
- 1185 25. Smithers SR, Terry RJ. The infection of laboratory hosts with cercariae of *Schistosoma*  
1186 *mansoni* and the recovery of the adult worms. *Parasitology*. 1965.  
1187 doi:10.1017/S0031182000086248
- 1188 26. Thompson JD, Higgins DG, Gibson TJ. ClustalW: improving the sensitivity of  
1189 progressive multiple sequence alignment through sequence weighting, position specific  
1190 gap penalties and weight matrix choice. *Nucleic Acids Res Acids Res*. 1994;22: 4673–  
1191 4680. doi:10.1093/nar/22.22.4673
- 1192 27. Kumar S, Stecher G, Li M, Knyaz C, Tamura K. MEGA X: Molecular evolutionary  
1193 genetics analysis across computing platforms. *Mol Biol Evol*. 2018;35: 1547–1549.



- 1194 doi:10.1093/molbev/msy096
- 1195 28. Ihara K, Muraguchi S, Kato M, Shimizu T, Shirakawa M, Kuroda S, et al. Crystal  
1196 structure of human RhoA in a dominantly active form complexed with a GTP  
1197 analogue. *J Biol Chem.* 1998;273: 9656–9666. doi:10.1074/jbc.273.16.9656
- 1198 29. Liang MP, Banatao DR, Klein TE, Brutlag DL, Altman RB. WebFEATURE: An  
1199 interactive web tool for identifying and visualizing functional sites on macromolecular  
1200 structures. *Nucleic Acids Res.* 2003. doi:10.1093/nar/gkg553
- 1201 30. Miguet L, Béchade G, Fornecker L, Zink E, Felden C, Gervais C, et al. Proteomic  
1202 analysis of malignant B-cell derived microparticles reveals CD148 as a potentially  
1203 useful antigenic biomarker for mantle cell lymphoma diagnosis. *J Proteome Res.* 2009.  
1204 doi:10.1021/pr801102c
- 1205 31. Fischle W, Dequiedt F, Fillion M, Hendzel MJ, Voelter W, Verdin E. Human HDAC7  
1206 Histone Deacetylase Activity is Associated with HDAC3 in Vivo. *J Biol Chem.*  
1207 2001;276: 35826–35835. doi:10.1074/jbc.M104935200
- 1208 32. Simoben C V., Robaa D, Chakrabarti A, Schmidtkunz K, Marek M, Lancelot J, et al. A  
1209 novel class of *Schistosoma mansoni* histone deacetylase 8 (HDAC8) inhibitors  
1210 identified by structure-based virtual screening and in vitro testing. *Molecules.* 2018.  
1211 doi:10.3390/molecules23030566
- 1212 33. Santos TM, Machado CR, Franco GR, Pena SDJ. Characterization and comparative  
1213 functional analysis in yeast of a *Schistosoma mansoni* Rho1 GTPase gene. *Mol*  
1214 *Biochem Parasitol.* 2002;125: 103–112. doi:10.1016/S0166-6851(02)00218-9
- 1215 34. Michaelson D, Silletti J, Murphy G, D’Eustachio P, Rush M, Philips MR. Differential  
1216 localization of Rho GTPases in live cells: Regulation by hypervariable regions and  
1217 RhoGDI binding. *J Cell Biol.* 2001. doi:10.1083/jcb.152.1.111
- 1218 35. Aspenström P, Ruusala A, Pacholsky D. Taking Rho GTPases to the next level: The

- 1219 cellular functions of atypical Rho GTPases. *Exp Cell Res.* 2007;313: 3673–3679.  
1220 doi:10.1016/j.yexcr.2007.07.022
- 1221 36. Van Aelst L, D. Souza-Schorey C. Rho GTPases and signaling networks. *Genes Dev.*  
1222 1997;11: 2295–2322.
- 1223 37. Wang Y, Zheng XR, Riddick N, Bryden M, Baur W, Zhang X, et al. ROCK isoform  
1224 regulation of myosin phosphatase and contractility in vascular smooth muscle cells.  
1225 *Circ Res.* 2009;104: 531–540. doi:10.1161/CIRCRESAHA.108.188524
- 1226 38. Yu X, Zhang Q, Zhao Y, Schwarz BJ, Stallone JN, Heaps CL, et al. Activation of G  
1227 protein-coupled estrogen receptor 1 induces coronary artery relaxation via Epac/Rap1-  
1228 mediated inhibition of RhoA/Rho kinase pathway in parallel with PKA. *PLoS One.*  
1229 2017. doi:10.1371/journal.pone.0173085
- 1230 39. Pan M, Chew TW, Pei Wong DC, Xiao J, Ong HT, Li Chin JF, et al. BNIP-2 retards  
1231 breast cancer cell migration by coupling microtubule-mediated GEF-H1 and RhoA  
1232 activation. *Sci Adv.* 2020. doi:10.1126/sciadv.aaz1534
- 1233 40. Vignal E, Blangy A, Martin M, Gauthier-Rouvière C, Fort P. Kinectin Is a Key  
1234 Effector of RhoG Microtubule-Dependent Cellular Activity. *Mol Cell Biol.* 2001.  
1235 doi:10.1128/mcb.21.23.8022-8034.2001
- 1236 41. Lippincott-Schwartz J. Cytoskeletal proteins and Golgi dynamics. *Curr Opin Cell Biol.*  
1237 1998. doi:10.1016/S0955-0674(98)80086-0
- 1238 42. Cho K, Vaught TG, Ji H, Gu D, Papasakelariou-Yared C, Horstmann N, et al. *Xenopus*  
1239 Kazrin interacts with ARVCF-catenin, spectrin and p190B RhoGAP, and modulates  
1240 RhoA activity and epithelial integrity. *J Cell Sci.* 2010. doi:10.1242/jcs.072041
- 1241 43. Wyszynski M, Kharazia V, Shangvi R, Rao A, Beggs AH, Craig AM, et al.  
1242 Differential regional expression and ultrastructural localization of  $\alpha$ -actinin-2, a  
1243 putative NMDA receptor-anchoring protein, in rat brain. *J Neurosci.* 1998.

- 1244 doi:10.1523/jneurosci.18-04-01383.1998
- 1245 44. Nakazawa T, Watabe AM, Tezuka T, Yoshida Y, Yokoyama K, Umemori H, et al.  
1246 p250GAP, a novel brain-enriched GTPase-activating protein for Rho family GTPases,  
1247 is involved in the N-methyl-D-aspartate receptor signaling. *Mol Biol Cell*. 2003.  
1248 doi:10.1091/mbc.E02-09-0623
- 1249 45. Karolczak-Bayatti M, Sweeney M, Cheng J, Edey L, Robson SC, Ulrich SM, et al.  
1250 Acetylation of heat shock protein 20 (Hsp20) regulates human myometrial activity. *J*  
1251 *Biol Chem*. 2011;286: 34346–34355. doi:10.1074/jbc.M111.278549
- 1252 46. Zaoui K, Honoré S, Isnardon D, Braguer D, Badache A. Memo - RhoA - mDia1  
1253 signaling controls microtubules, the actin network, and adhesion site formation in  
1254 migrating cells. *J Cell Biol*. 2008;183: 401–408. doi:10.1083/jcb.200805107
- 1255 47. Young KG, Copeland JW. Formins in cell signaling. *Biochimica et Biophysica Acta -*  
1256 *Molecular Cell Research*. 2010. pp. 183–190. doi:10.1016/j.bbamcr.2008.09.017
- 1257 48. Tominaga T, Sahai E, Chardin P, McCormick F, Courtneidge SA, Alberts AS.  
1258 Diaphanous-related formins bridge Rho GTPase and Src tyrosine kinase signaling. *Mol*  
1259 *Cell*. 2000;5: 13–25. doi:10.1016/S1097-2765(00)80399-8
- 1260 49. Simoben C V., Robaa D, Chakrabarti A, Schmidtkunz K, Marek M, Lancelot J, et al. A  
1261 novel class of *Schistosoma mansoni* histone deacetylase 8 (HDAC8) inhibitors  
1262 identified by structure-based virtual screening and in vitro testing. *Molecules*. 2018;23.  
1263 doi:10.3390/molecules23030566
- 1264 50. Li J, Chen S, Cleary RA, Wang R, Gannon OJ, Seto E, et al. Histone deacetylase 8  
1265 regulates cortactin deacetylation and contraction in smooth muscle tissues. *Am J*  
1266 *Physiol - Cell Physiol*. 2014. doi:10.1152/ajpcell.00102.2014
- 1267 51. Chakrabarti A, Oehme I, Witt O, Oliveira G, Sippl W, Romier C, et al. HDAC8: A  
1268 multifaceted target for therapeutic interventions. *Trends Pharmacol Sci*. 2015;36: 481–

1269 492. doi:10.1016/j.tips.2015.04.013

1270 52. Rinaldi G, Sankaranarayanan G, Coghlan A, Driguez P, Lotkowska ME, Sanders M, et  
1271 al. Large CRISPR-Cas-induced deletions in the oxamniquine resistance locus of the  
1272 human parasite *Schistosoma mansoni*. Wellcome Open Res. 2020.  
1273 doi:10.12688/wellcomeopenres.16031.1

1274

## 1275 Supplementary data

1276

1277

1278

1279

1280

1281

1282

1283

1284

1285

1286

1287

| Protein name | Protein molecular weight (Da) | Percentage sequence coverage |      | Peptide sequence                                                                                                                                                                                                                                  |                                                                                                                                                                                                                                                               | Total number unique peptide/spectra |       |
|--------------|-------------------------------|------------------------------|------|---------------------------------------------------------------------------------------------------------------------------------------------------------------------------------------------------------------------------------------------------|---------------------------------------------------------------------------------------------------------------------------------------------------------------------------------------------------------------------------------------------------------------|-------------------------------------|-------|
|              |                               | IP-1                         | IP-2 | IP-1                                                                                                                                                                                                                                              | IP-2                                                                                                                                                                                                                                                          | IP-1                                | IP-2  |
| SmRho1.1     | 21787                         | 77%                          | 53%  | DQFPEVYVPTVFENYVADIEVDNR-EGVSDVFVAATR-HFcPDVPIVLVGNK-HFcPDVPIVLVGNKK-<br>ISAYAFFEcSAK-KLVIVGDGAcGK-<br>LRPLSYPDTDVLVLLcYSIDSPDSFANIEEK-<br>LVIVGDGAcGK-QLPVTFNEGK-<br>QLPVTFNEGKQVAEK-QVELALWDTAGQEDYDR-<br>TeLLIVFSK-TKEGVSDVFVAATR-TKQLPVTFNEGK | DQFPEVYVPTVFENYVADIEVDNR-<br>EGVSDVFVAATR-HFcPDVPIVLVGNK-<br>HFcPDVPIVLVGNKK-ISAYAFFEcSAK-<br>KLVIVGDGAcGK-<br>LRPLSYPDTDVLVLLcYSIDSPDSFANIEEK-<br>LVIVGDGAcGK-QLPVTFNEGK-<br>QLPVTFNEGKQVAEK-<br>QVELALWDTAGQEDYDR-TeLLIVFSK-<br>TKEGVSDVFVAATR-TKQLPVTFNEGK | 14/80                               | 10/16 |
| SmRho1.2     | 21858                         | 59%                          | 46%  | EGVSDVFVAATR-HFcPDVPIVLVGNK-<br>HFcPDVPIVLVGNKK-KLVIVGDGAcGK-<br>LVIVGDGAcGK-QLPVTFNEGK-<br>QLPVTFNEGKEmAENINAYAFFEcSAK-<br>QVELALWDTAGQEDYDR-TeLLIVFSK-<br>TKEGVSDVFVAATR-TKQLPVTFNEGK-<br>VYVPTVFENYVADIEVDNR                                   | EGVSDVFVAATR-HFcPDVPIVLVGNK-<br>HFcPDVPIVLVGNKK-KLVIVGDGAcGK-<br>LVIVGDGAcGK-QLPVTFNEGK-<br>QLPVTFNEGKEmAENINAYAFFEcSAK-<br>QVELALWDTAGQEDYDR-TeLLIVFSK-<br>TKEGVSDVFVAATR-TKQLPVTFNEGK-<br>VYVPTVFENYVADIEVDNR                                               | 12/79                               | 9/15  |

1288 **S1 Figure: Identification of SmRho1.1 and SmRho1.2 by mass spectrometry following**  
1289 **the IP of SmRho1 isoforms in adult worms.**

1290 The table indicates the sequence, the molecular weight, the percentage of sequence coverage  
1291 and the number of “unique peptides/spectra” for each identified protein in two biological  
1292 independent assays (IP1 and IP2).

1293

1294

1295

1296

1297  
 1298  
 1299  
 1300  
 1301  
 1302  
 1303  
 1304  
 1305  
 1306  
 1307  
 1308  
 1309  
 1310  
 1311  
 1312  
 1313  
 1314  
 1315  
 1316  
 1317  
 1318  
 1319  
 1320  
 1321  
 1322  
 1323  
 1324  
 1325

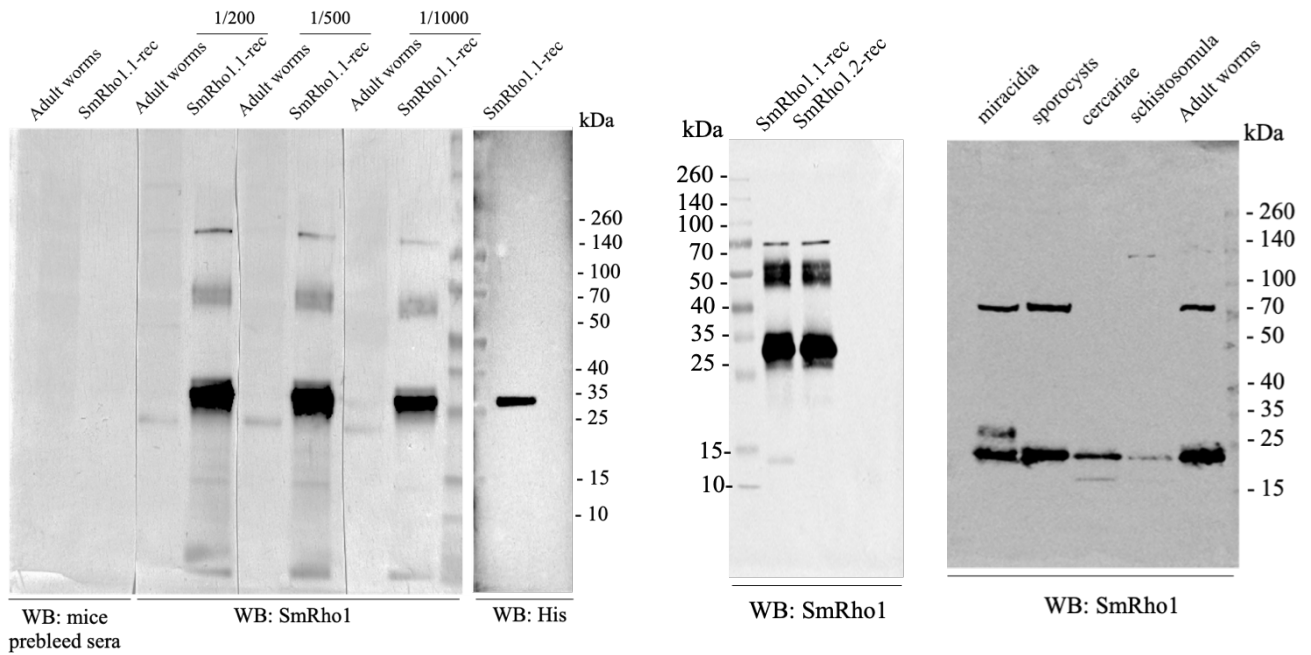

**S2 Figure: Mouse antiserum anti-SmRho1 evaluation.**

(A) Detection of adult worms endogenous SmRho1 and SmRho1.1 recombinant protein.

The blots were probed with mouse prebleed sera, with mouse anti-SmRho1 antisera tested at 1/200, 1/500 and 1/1 000 dilution and with mAb anti-His.

(B) immunoblot analysis of recombinant SmRho1.1 (SmRho1.1-rec) and SmRho1.2 (SmRho1.2-rec) proteins with mouse anti-SmRho1 antisera. (C) detection of endogenous SmRho1 in total proteins extracted from parasitic stages of *S. mansoni*.

1326

1327

1328

1329

1330 ♂

1331

1332

1333

1334

1335 ♀

1336

1337

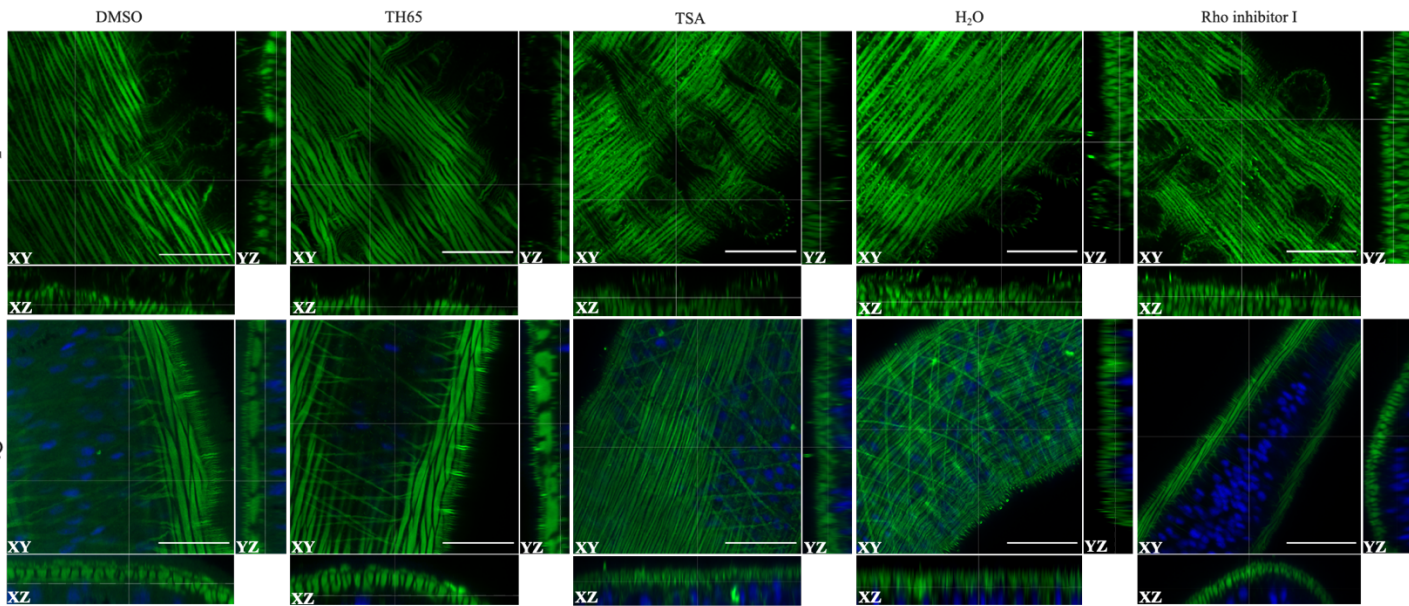

1338

**S3 Figure: Confocal images with orthogonal views of *S. mansoni* adult worms after**

1339

**RNAi.** Scale bar represent 20  $\mu$ m, magnification, x630.

1340

1341

1342

1343 ♂

1344

1345

1346

1347

1348

1349 ♀

1350

1351

1352

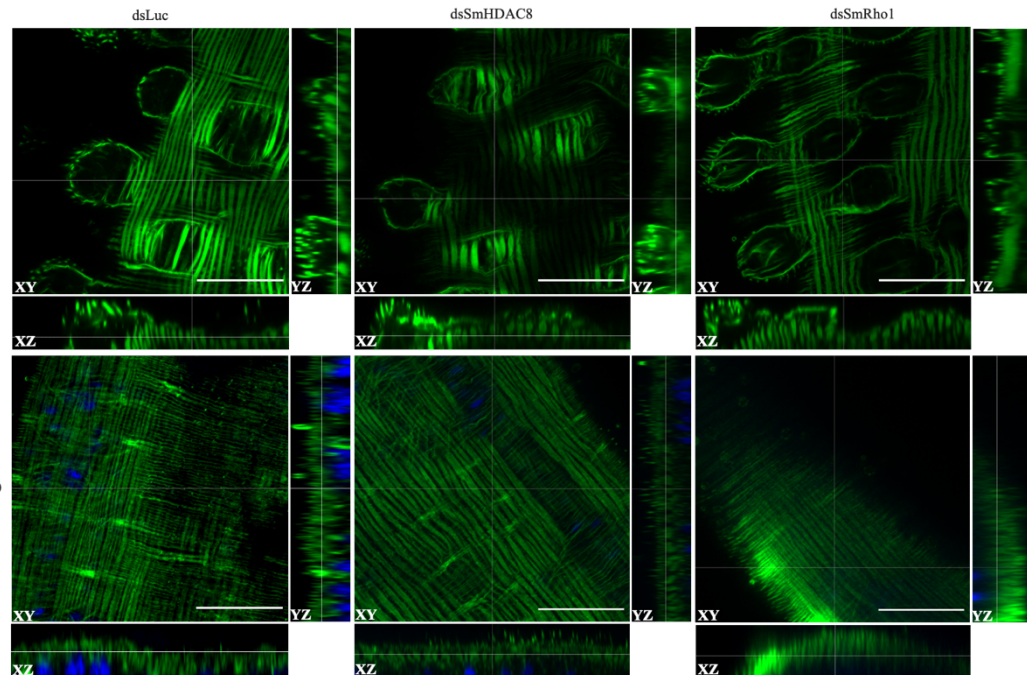

1353

**S4 Figure: Confocal images with orthogonal views of *S. mansoni* adult worms after**

1354

**inhibitor treatment.** Scale bar represent 20  $\mu$ m, magnification, x630.

1355

1356

1357  
 1358  
 1359  
 1360  
 1361  
 1362  
 1363  
 1364  
 1365  
 1366  
 1367  
 1368  
 1369  
 1370

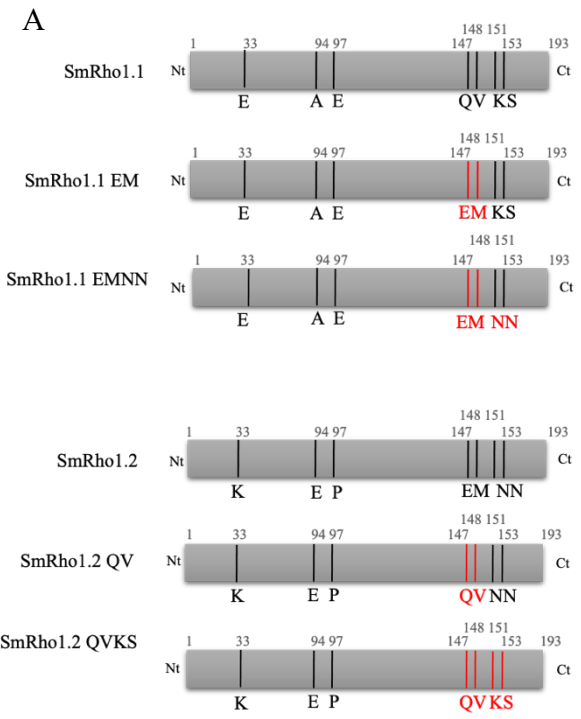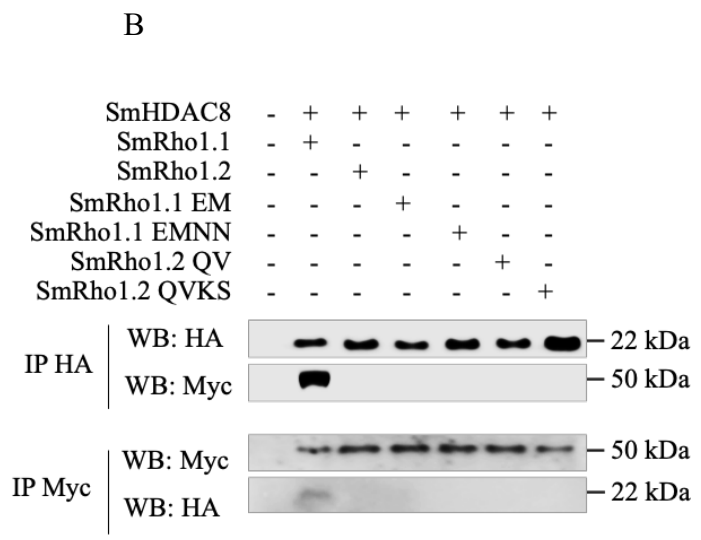

1371 **S5 Figure: SmRho1.2 mutations do not restore the interaction between SmHDAC8 and**

1372 **SmRho1.2.**

1373 (A) Schematic structure of SmRho1.1 and SmRho1.2 mutants. Using site-directed  
 1374 mutagenesis, the glutamine Q147 and the valine V148 of SmRho1.1 were substituted by a  
 1375 glutamic acid and a methionine (SmRho1.1 EM) and then the lysine K151 and the serine  
 1376 S153 by two asparagines (SmRho1.1 EMNN). SmRho1.2 QV and SmRho1.2 QVKS mutants  
 1377 were produced by site-directed mutagenesis using SmRho1.2 protein. First, the glutamic acid  
 1378 E147 and the methionine M148 were substituted by a glutamine and a valine and then, the  
 1379 two asparagines N151 and N153 were replaced by a lysine and a serine.

1380 (B) Co-immunoprecipitation and Western Blot experiments performed in *Xenopus* oocytes  
 1381 revealed that SmRho1.2 mutants (HA-tagged) are not able to bind SmHDAC8 (Myc-tagged).  
 1382 cRNAs encoding HA-tagged SmRho1 isoforms, SmRho1.1 mutants or SmRho1.2 mutants  
 1383 were co-injected in *Xenopus* oocytes with cRNA encoding Myc-tagged SmHDAC8. Oocytes  
 1384 were incubated in ND96 medium and lysed. Proteins from soluble extracts were  
 1385 immunoprecipitated (IP) by anti-HA or anti-Myc antibodies and analyzed by Western Blot

1386 (WB) to detect SmHDAC8 (50 kDa), SmRho1 isoforms (22 kDa) or SmRho1 mutants (22  
1387 kDa) with anti-Myc or anti-HA antibodies.

1388 **S1 Table: List of primers**

1389 **S2 Table: List of proteins and Uniprot numbers used in phylogenetic analysis**

1390 **S3 Table: SmRho1 partners from Co-IP/MS analysis.**

1391 Sheet “IP1-IP2 full list” contains the 1,672 different proteins identified from the two  
1392 independent Co-IP/MS experiments IP1, IP2 respectively. Sheets “IP1 SmRho1-selected  
1393 protein” and “IP2 SmRho1selected proteins” contain the 86 and 32 different proteins obtained  
1394 after the selection step (cf. manuscript for details) for IP1 and IP2 respectively.

1395

1396
